1 **A scalable Bayesian method for integrating functional information in genome-wide**  
2 **association studies**

3 Jingjing Yang<sup>1</sup>, Lars G. Fritsche<sup>1,2</sup>, Xiang Zhou<sup>1\*</sup>, Gonçalo Abecasis<sup>1\*</sup> for the International Age-related  
4 Macular Degeneration Genomics Consortium (IAMDGC)

5 <sup>1</sup>Center for Statistical Genetics, Department of Biostatistics, University of Michigan School of Public Health,  
6 1415 Washington Heights, Ann Arbor, MI 48109, USA.

7 <sup>2</sup>K.G. Jebsen Center for Genetic Epidemiology, Department of Public Health, NTNU, Norwegian University of  
8 Science and Technology, Trondheim, Norway.

9 \*Correspondence to: X.Z. ([xzhousph@umich.edu](mailto:xzhousph@umich.edu)) or G.A. ([goncalo@umich.edu](mailto:goncalo@umich.edu))

10  
11 **Abstract: (164 words)**

12 Genome-wide association studies (GWASs) have identified many complex trait loci. To understand  
13 the biological mechanisms underlying these, we pair a flexible Bayesian method with efficient  
14 computational techniques to model functional information in GWASs. We model the effect-size  
15 distribution and probability of causality for variants with different annotation, explicitly allowing for  
16 multiple causal-variants per locus. In simulations, our method shows higher power to identify true  
17 causal-variants than competing methods. In a GWAS of age-related macular degeneration with  
18 33,976 individuals and 9,857,286 variants, we find the strongest enrichment for causality among  
19 non-synonymous variants (54x more likely to be causal, 1.4x larger effect-sizes) and among  
20 variants in active promoters (7.8x more likely, 1.4x larger effect-sizes). Importantly, when multiple  
21 causal-variants reside in the same locus, our approach improves upon the list of candidate variants  
22 produced by sequential forward selection or methods only allowing for a single causal-variant per  
23 locus. In conclusion, our method is shown to efficiently integrate functional information in GWASs,  
24 helping identify causal-variants and underlying biology.

25  
26 **Keywords:** functional annotation, genome-wide association study (GWAS), Bayesian variable  
27 selection regression (BVSR), expectation-maximization (EM), Markov chain Monte Carlo (MCMC).

28 Genome-wide association studies (GWASs) have identified thousands of genetic loci for  
29 complex traits and diseases, providing new insights into the underlying genetic architecture<sup>1-5</sup>. Each  
30 associated locus typically contains hundreds of variants in linkage disequilibrium (LD)<sup>6,7</sup>, most of  
31 which are of unknown function and located outside protein-coding regions. Unsurprisingly, the  
32 biological mechanisms underlying the identified associations are often unclear<sup>8</sup> and pinpointing  
33 causal variants is difficult<sup>9</sup>.

34 Recent functional genomic studies help understand and pinpoint causal variants and  
35 mechanisms<sup>10-12</sup>. Genetic variants can be annotated based on the genomic location (e.g., coding,  
36 intronic, and intergenic), role in determining protein structure and function (e.g., Sorting Intolerant  
37 From Tolerant (SIFT)<sup>13</sup> and Polymorphism Phenotyping (PolyPhen)<sup>14</sup> scores), ability to regulate  
38 gene expression (e.g., expression quantitative trait loci (eQTL) and allelic specific expression (ASE)  
39 evidence<sup>15,16</sup>), biochemical function (e.g., DNase I hypersensitive sites (DHS), metabolomic QTL  
40 (mQTL) evidence<sup>17</sup>, and chromatin states<sup>18-20</sup>), evolutionary significance (e.g., Genomic Evolutionary  
41 Rate Profiling (GERP) annotations<sup>21</sup>), and a combination of different types of annotation (e.g.,  
42 CADD<sup>22</sup>). Many statistical methods, including stratified LD score regression<sup>23</sup> and MINQUE<sup>24</sup>, can  
43 now evaluate the role of functional annotations in GWASs through heritability analysis. Preliminary  
44 studies also show higher proportions of associated variants in protein-coding exons, regulatory  
45 regions, and cell-type-specific DHSs<sup>25-27</sup>.

46 Integrating functional information into GWASs is expected to help identify and prioritize true  
47 causal associations. However, accomplishing this goal in practice requires methods to account for  
48 both LD and computational cost. Consider two recent methods, Fgwas<sup>26</sup> and PAINTOR<sup>27</sup>, as  
49 examples: Fgwas assumes that variants are independent and there is at most one causal variant  
50 per locus, modeling no LD, which dramatically improves computational speed and allows Fgwas to  
51 be applied at genome-wide scale; PAINTOR accounts for LD, assuming the possibility of multiple  
52 association signals per locus, but is computationally slow and can only be used to fine-map small  
53 regions.

54 Here, we pair a flexible Bayesian method with an efficient computational algorithm. Together  
55 the two represent an attractive means to incorporate functional information into association

56 mapping. Our model accounts for genotype correlation due to LD, allows for multiple causal variants  
57 per locus and, importantly, shares information genome-wide to increase association-mapping  
58 power. Our algorithm takes advantage of the local LD structure in the human genome<sup>28-30</sup> and  
59 refines previous Markov chain Monte Carlo (MCMC) algorithms to greatly improve mixing, which is  
60 key when searching for causal variants among many associated variants in LD (but less important in  
61 other applications such as modeling total genomic heritability). Because of these features, we refer  
62 to our method as the Scalable Functional Bayesian Association (SFBA). Below, we illustrate the  
63 benefits of SFBA with extensive simulations and real data analyses of a large-scale GWAS on age-  
64 related macular degeneration (AMD)<sup>31</sup> with 33,976 individuals and 9,857,286 genotyped or imputed  
65 variants. Our method is implemented in the software SFBA, freely available at  
66 <https://github.com/yijingj/SFBA>.

67

## 68 **RESULTS**

### 69 **Method overview**

70 Our method is based on the standard Bayesian variable selection regression (BVSR) model  
71 (Online Methods and Supplementary Information; Supplementary Figure 1(a)), allowing for  
72 annotations that classify variants into  $K$  non-overlapping categories. We assume that variants in  
73 annotation category  $q$  share a “spike-and-slab” prior<sup>32,33</sup> for effect-sizes,  $\beta_i \sim \pi_q N(0, \tau^{-1} \sigma_q^2) +$   
74  $(1 - \pi_q) \delta_0(\beta_i)$ . This model implies effect sizes are normally distributed as  $\beta_i \sim N(0, \tau^{-1} \sigma_q^2)$  with  
75 probability  $\pi_q$ , or set to zero with probability  $(1 - \pi_q)$ , with  $\delta_0(\beta_i)$  denoting the point-mass function at  
76 0. Here,  $\pi_q$  represents the (unknown) causal probability for variants in the  $q$ th category and  $\sigma_q^2$   
77 represents the (unknown) corresponding effect-size variance. An enhancement to previous  
78 Bayesian models<sup>33-35</sup> is that we model both the proportion of associated variants and their effect-  
79 size distribution in each annotation category.

80 Our goal is to simultaneously make inference on category specific parameters  $(\pi_q, \sigma_q^2)$  that  
81 represent the importance of each functional category, and on the variant specific parameters —  
82 effect-size  $\beta_i$  and the probability of  $\beta_i \neq 0$  (referred as posterior inclusion probability ( $PP_i$ )),

83 representing association evidence). Our model shares information among genome-wide to estimate  
84 category specific parameters, which then inform the variant specific parameters. As a result, variant  
85 associations will be prioritized based on the inferred importance of functional categories.

86 Because standard MCMC algorithms suffer from heavy computational burden and poor  
87 mixing of posterior samples for large GWASs, we develop a novel scalable expectation-  
88 maximization MCMC (or EM-MCMC) algorithm. Our algorithm is based on the observation that LD  
89 decays exponentially with distance and displays local block-wise structure along the human  
90 genome<sup>28-30,36,37</sup>. This observation allows us to decompose the complex joint likelihood of our model  
91 into a product of block-wise likelihoods (Online Methods and Supplementary Information). Intuitively,  
92 conditional on a common set of category specific parameters  $(\pi_q, \sigma_q^2)$ , we can infer  $(\beta_i, PP_i)$  by  
93 running the MCMC algorithm per genome-block. A diagram of this EM-MCMC algorithm is shown in  
94 Supplementary Figure 1(b).

95 Running MCMC per genome-block facilitates parallel computing and reduces the search  
96 space. Unlike previous MCMC algorithms for GWAS that use proposal distributions based only on  
97 marginal association evidence (such as implemented in GEMMA<sup>38</sup>), our MCMC algorithm uses a  
98 proposal distribution that favors variants near the “causal” variants being considered in each  
99 iteration, and prioritizes among these neighboring variants based on their conditional association  
100 evidence (see Supplementary Information). Our strategy dramatically improves the MCMC mixing  
101 property, encouraging our method to explore different combinations of potentially causal variants in  
102 each locus (Supplementary Figure 2). In addition, we implemented memory reduction techniques  
103 that reduce memory usage up to 97%, effectively reducing the required physical memory from 120  
104 GB (usage by GEMMA<sup>38</sup>) to 3.6 GB for a GWAS with ~33K individuals and ~400K genotyped  
105 variants (Online Methods and Supplementary Information).

106 In practice, we segment the whole genome into blocks of 5,000 ~ 10,000 variants, based on  
107 marginal association evidence, genomic distance, and LD. We always ensure variants in LD ( $R^2$   
108  $>0.1$ ) with significant signals (P-values  $<5 \times 10^{-8}$ ) are in the same block (Online Methods). We first  
109 initialize category specific parameters  $(\pi_q, \sigma_q^2)$ , then run the MCMC algorithm per block (E-step),

110 summarize the MCMC posterior estimates of  $(\beta_i, PP_i)$  across all blocks to update  $(\pi_q, \sigma_q^2)$  (M-step),  
111 and repeat the block-wise EM-MCMC steps until  $(\pi_q, \sigma_q^2)$  estimates converge (Supplementary  
112 Figure 1(b)).

113 In addition, we calculate the regional posterior inclusion probability (regional-PP) per block  
114 that is the proportion of MCMC iterations with at least one “causal” variant (see Supplementary  
115 Information). Because Bayesian PP might be split among multiple variants in high LD, the threshold  
116 of regional-PP  $>0.95$  (conservatively analogous to false discovery rate 0.05) is used for identifying  
117 loci.

118

### 119 **Simulation**

120 We simulated phenotypes with the genotype data (chromosomes 20-22) from the AMD  
121 GWAS<sup>31</sup>, including 33,976 individuals and 241,500 variants with minor allele frequency (MAF)  $>0.1$ .  
122 We segmented this small genome into 50 x 2.5Mb blocks, each with ~5,000 variants. Within each  
123 block, we marked a 25KB continuous region (starting 37.5Kb from the beginning of a block) as the  
124 causal locus and randomly selected two causal single nucleotide polymorphisms (SNPs) per locus.  
125 We simulated two complementary annotations to classify variants into “coding” and “noncoding”  
126 groups, where the coding variants account for ~1% overall variants but ~10% variants within the  
127 causal loci (matching the pattern in the real AMD data). We simulated two scenarios: (i) coding  
128 variants ~44x enriched among causal variants (30 coding vs. 70 noncoding); (ii) no enrichment (1  
129 coding vs. 99 noncoding). A total of 15% of phenotypic variance was divided equally among causal  
130 variants. We compared SFBA with single variant likelihood-ratio test, conditional analysis (CA), and  
131 Fgwas. The single variant test P-value (also referred to as P-value), conditioned P-value, Fgwas  
132 posterior association probability (PP, see Online Methods), and our Bayesian PP were used as  
133 criteria to identify associations.

134 We first compared power of different methods using average ROC curves<sup>27,33</sup> across 100  
135 simulation replicates. Fgwas was more powerful than P-value at low false-positive rates (FPR),  
136 presumably because Fgwas incorporates annotation information (Figure 1(a)). However, with high

137 false-positive rates, Fgwas underperformed P-value, presumably because Fgwas incorrectly  
138 assumes one variant per locus. In contrast, SFBA (modeling LD and allowing multiple causal  
139 variants per locus) outperformed both Fgwas and P-value for false-positive rates in (0, 0.01).  
140 Importantly, the advantage of SFBA became more pronounced with increasing sample size  
141 (Supplementary Figure 3). Specifically, the power (based on FPR=0.5%) of SFBA increased from  
142 48% to 64% as the sample size increased from 20K to 33K, while the power of Fgwas only  
143 increased from 52% to 56% and the power of P-values only increased from 47% to 52%. In  
144 addition, with sample size 33K and the threshold of regional-PP >0.95, SFBA has power 92.3% to  
145 identify associated loci, versus Fgwas with 88.6% power. The advantage of SFBA with large sample  
146 size suggests that SFBA can better extract the richer information available as sample size  
147 increases.

148 In a typical GWAS, researchers identify a series of associated loci and then examine  
149 associated variants within each locus independently. We examined the ability of each method to  
150 prioritize the true causal variants in each locus. Since we simulated two causal SNPs per locus  
151 (SNP1 and SNP2), we examine the power for identifying each of these separately (Figure 1(b)). All  
152 methods have the same median rank for causal SNP1 (typically, ranked 3rd rank among 150 SNPs  
153 in the locus by P-value, Fgwas and SFBA), suggesting that the strongest signal in a locus can often  
154 be identified without incorporating functional information. The median rank for the second causal  
155 SNP2 was the 7th by SFBA, 12th by Fgwas, 17th by P-value, and 18th by conditional analysis —  
156 suggesting that incorporating functional information improves power to identify multiple signals in a  
157 locus. Stratified results based on the LD between two causal variants further demonstrate that  
158 SFBA has the highest power for identifying the weaker signal, especially when both SNPs are in  
159 high LD (Supplementary Figure 4).

160 Both SFBA and Fgwas correctly identified enrichment in scenario (i) and properly controlled  
161 for the type I error of enrichment in scenario (ii), despite some numerical issues for Fgwas  
162 (Supplement Figure 5). Moreover, SFBA estimated the effect-size variance per annotation. For all  
163 100 simulation replicates under both scenarios, the 95% confidence intervals of the log-ratio of  
164 estimated effect-size variances between coding and noncoding overlapped with 0 (Supplementary

165 Figure 6), suggesting effect-size variances were similar between two annotations (matching the  
166 simulated truth).

167 In summary, our simulation studies show that, in comparisons with competing methods,  
168 SFBA has higher power, especially in loci with multiple associated variants and when the sample  
169 size is large. Further, SFBA produces enrichment parameter estimates that can help with  
170 interpretation of association results.

171

## 172 **GWAS of AMD**

173 Next, we applied our method to a GWAS of age-related macular degeneration (AMD) with  
174 16,144 advanced cases and 17,832 controls, for a total of 33,976 unrelated European individuals. A  
175 total of 439,350 variants were genotyped on a customized Exome-Chip, and then imputed up to  
176 12,023,830 variants in 1000 Genomes Project Phase 1<sup>39,40</sup>. We analyzed 9,866,744 (~10M) low-  
177 frequency and common variants (MAF >0.5%) with three types of genomic annotations: gene-based  
178 functional annotations by SeattleSeq, summarized regulatory annotations<sup>41</sup>, and the chromatin  
179 states profiled in nine human cell types from chromHMM<sup>42,43</sup>.

180

## 181 **Coding variation and AMD.**

182 We used SeattleSeq to classify variants according to their impact on coding sequences  
183 (Supplementary Table 1) and then applied our method SFBA and Fgwas. SFBA identified 37 loci  
184 out of 1,063 considered genome-blocks with regional-PP >0.95 (Supplementary Tables 2, 3, and 5),  
185 including 32 among the 34 known AMD loci<sup>31</sup> and 5 potentially novel loci. Using the threshold of  
186 Bayesian PP >0.1068 (roughly equivalent to the P-value  $5 \times 10^{-8}$  based on permutations of AMD  
187 data; Supplementary Figure 7), we identified 150 associated variants (Supplementary Figure 9(a);  
188 Supplementary Table 3), with 47 distributed among 42,005 non-synonymous variants, 4 among  
189 67,165 synonymous coding variants, 54 among 3,679,235 intronic variants, 18 among 5,512,423  
190 intergenic variants (including non-annotated variants), and 27 among 565,916 “other-genomic”  
191 variants (UTR, non-coding exons, upstream and downstream of genes). Very roughly, this  
192 corresponds to fraction of associated variants of ~1:1,000 among non-synonymous variants,

193 1:15,000 among synonymous variants, 1:100,000 among intronic variants, 1:300,000 among  
194 intergenic variants and 1:20,000 among “other-genomic” variants.

195 Similarly, Fgwas identified 46 loci by regional-PP >0.95, including all 34 known loci and 12  
196 potentially novel loci (Supplementary Tables 2, 4, and 6; Supplementary Figure 9(b)). Since Fgwas  
197 analyzed the whole genome as 4,934 segments (each with 2,000 variants) and, thus, partitioned the  
198 genome somewhat differently than our method. Fgwas identified 178 associated variants with  
199 Fgwas PP >0.1068, including 24 non-synonymous, 13 coding-synonymous, 42 intronic, 40  
200 intergenic, and 59 other-genomic signals. Compared with SFBA, the proportion of loci that contain  
201 at least one non-synonymous variant with PP >0.1068 is significantly smaller (11 out of 46 by  
202 Fgwas vs. 18 of 37 by SFBA; P-value = 0.017). Similarly, the proportion of non-synonymous  
203 variants prioritized by Fgwas is also significantly smaller (24 out of 178 by Fgwas vs. 47 of 150 by  
204 SFBA; P-value =  $7.7 \times 10^{-5}$ ), indicating that SFBA places greater weight on coding variants —  
205 which, as a group, appears to have both a higher prior probability of association and larger effect  
206 sizes when associated.

207 Besides replicating the association results within known AMD loci<sup>31</sup>, SFBA identified five  
208 novel loci (Supplementary Table 5): missense *rs7562391/PPIL3*, *rs61751507/CPN1*,  
209 *rs2232613/LBP*, downstream *rs114348558/ZNRD1-AS1*, and splice *rs6496562/ABHD2*. These loci  
210 were also identified by Fgwas (Supplementary Table 6) with different top association variants for  
211 *CPN1* (coding-synonymous *rs61733667*) and *ZNRD1-AS1* (downstream *rs116112857*).  
212 Interestingly, there are several connections between these potentially novel loci and known AMD  
213 loci. For example, the protein encoded by *LBP* is part of the lipid transfer protein family (which also  
214 includes *CETP* among the known AMD risk loci) that promotes the exchange of neutral lipids and  
215 phospholipids between plasma lipoproteins<sup>46</sup>. Similarly, *ZNRD1-AS1* has been associated with lipid  
216 metabolisms<sup>47</sup> and *ABHD2* has been associated with coronary artery disease<sup>48</sup>, two other traits  
217 where the AMD loci encoding *CETP*, *APOE*, and *LIPC* are also involved. The gene *CPN1* has been  
218 associated with age-related disease (specifically, hearing impairment<sup>45</sup>).

219

220 *Multiple signals in a single locus*



221 We use two examples to illustrate the importance of studying multiple signals in a single  
222 locus. Our first example focuses on a 1Mb region around locus *C2/CFB/SKIV2L* on chromosome 6  
223 where 1,862 variants have P-values  $< 5 \times 10^{-8}$ . There are an estimated 4 independent signals in  
224 the region by conditional analysis<sup>31</sup>, 21 variants with Fgwas PP  $> 0.1068$ , 11 with Bayesian PP  
225  $> 0.1068$  by the standard Bayesian variable selection regression (BVSR) method that models no  
226 functional information, and 12 with Bayesian PP  $> 0.1068$  by SFBA. Interestingly, the alternative  
227 methods (P-value, Fgwas, and BVSR) identified intronic SNP *rs116503776/SKIV2L/NELFE* as the  
228 top candidates (P-value =  $2.1 \times 10^{-114}$ ; Fgwas PP = 0.912; BVSR PP = 1.0), while SFBA identified  
229 two missense SNPs *rs4151667/C2/CFB* (P-value =  $1.4 \times 10^{-44}$ ; SFBA PP = 0.917) and  
230 *rs115270436/SKIV2L/NELFE* (P-value =  $2.8 \times 10^{-99}$ ; SBA PP = 0.633) as the top functional  
231 candidates (Figure 2; Supplementary Tables 2-4).

232 A haplotype analysis describing the odds ratios (ORs) for all possible haplotypes for SNPs  
233 *rs116503776*, *rs4151667*, and *rs115270436*, helps clarify the region. Intronic SNP *rs116503776*  
234 with the smallest P-value appears to be associated with the phenotype by tagging the other two  
235 missense SNPs (Supplementary Table 15). In particular, haplotypes with *rs116503776* can either  
236 increase or decrease risk, depending on alleles at the other two SNPs. To further confirm the  
237 importance of the missense SNPs *rs4151667* and *rs115270436*, we compared the  
238 AIC/BIC/loglikelihood between two models: one model with top two independent signals  
239 (*rs116503776* and *rs114254831*) identified by single-variant conditional analysis<sup>31</sup>, versus the other  
240 model with top two signals (*rs4151667* and *rs115270436*) identified by SFBA. As expected, the  
241 second model has smaller AIC/BIC and larger loglikelihood than the first one (Supplementary Table  
242 16). Thus, we can see that while alternative methods (P-value, Fgwas, and BVSR) focus on the  
243 SNP with the smallest P-value, our SFBA method finds an alternative pairing of missense signals  
244 that better accounts for all data.

245 Our second example focuses on a 1Mb region around gene *C3* on chromosome 19  
246 (Supplementary Figure 10) with 112 genome-wide significant variants with P-value  $< 5 \times 10^{-8}$ .  
247 Fgwas only discovered a single missense signal, *rs2230199* with the most significant P-value =  $1.7 \times$

248  $10^{-77}$  (top blue triangle in Supplementary Figure 10(a, c)). However, both BVSR and SFBA  
249 identified 2 missense variants with PPs = 1.0, and 5 intronic variants with  $0.11 < \text{PPs} < 0.18$ . The top  
250 two missense signals *rs2230199* and *rs147859257* (241 base pairs apart) were confirmed by  
251 conditional analysis<sup>31</sup>, where the second signal *rs147859257* has conditioned P-value= $6.0 \times 10^{-33}$   
252 (the purple triangle in Supplementary Figure 10(b, d), overlapping with *rs2230199*). These two  
253 missense signals match the interpretation of previous studies<sup>49-51</sup>. Because other 5 intronic variants  
254 (*rs11569479*, *rs11569470*, *rs201063729*, *rs10408682*, *rs11569466*) are in high LD with between  
255 variant  $R^2 > 0.98$ , we believe this is the third independent signal whose Bayesian PP was split  
256 among 5 variants in high LD by SFBA.

257

### 258 Enrichment analysis

259 SFBA estimated that non-synonymous variants are 10-100 times more likely to be causal  
260 than variants in other categories and that they also have larger effect-sizes (Figure 3(a, b)). To  
261 better compare enrichment among multiple categories, we define two new sets of parameters  
262 (Supplementary Information). The first set of parameters,  $(\pi_q/\pi_{avg})$ , is defined to contrast the  
263 posterior association probability estimate ( $\pi_q$ ) for each category to the genome-wide average ( $\pi_{avg}$ ).  
264 The second set of parameters  $(\sigma_q^2/\sigma_{avg}^2)$  is similarly defined to contrast the effect-size variance from  
265 each category to the genome-wide average. Moreover, the square root of the effect-size variance  
266 reflects the effect-size magnitude because of the prior assumption for the effect-size in our model.

267 Compared to the genome-wide average probability of causality  $\pi_{avg} = 4.3 \times 10^{-06}$   
268 (Supplementary Figure 12(a)), we found that non-synonymous category were 54x more likely to be  
269 causal (P-value=  $7.24 \times 10^{-84}$ ); that coding-synonymous and other variants were 4.3x and 2.2x  
270 more likely (P-values = 0.005, 0.003); and that intergenic 0.7x less likely (P-value= $4.9 \times 10^{-6}$ ); while  
271 the intronic variants matched the genome-wide average (P-value=0.659). In addition, compared to  
272 the genome-wide average effect-size variance ( $\sigma_{avg}^2 = 0.02$ ; Supplementary Figure 12(b)), we found  
273 that the effect size variance of was 1.9x larger for non-synonymous variants (P-value=0.014; i.e.,  
274 1.4x larger effect-size); and 0.4x smaller for variants in the intronic category (P-value= $4.5 \times 10^{-06}$ );

275 remaining categories were not significantly different (P-values >0.2). The estimated enrichment  
276 parameters by Fgwas show a similar pattern, although the contrast of the estimated enrichment for  
277 non-synonymous versus other annotations is not as pronounced as by SFBA (Supplementary  
278 Figure 11(a)).

279

## 280 **Analysis with regulatory annotations**

281 Second, we analyzed the GWAS data of AMD with the summarized regulatory annotations<sup>41</sup>:  
282 coding, UTR, promoter (defined as within 2KB of a transcription starting site), DHS in any of 217 cell  
283 types, intronic, intergenic, and “others” (not annotated as any of the previous six categories). Overall  
284 GWAS results were similar as the ones described in previous context (Supplementary Tables 7-10).  
285 Compared to the genome-wide average association probability ( $\pi_{avg}=4.03 \times 10^{-6}$ ; Supplementary  
286 Figure 12(c)), we found that the association probability of the coding category was 28x higher (P-  
287 value  $<2.2 \times 10^{-16}$ ); the promoter was 2.6x (P-value=0.028) higher; the intergenic and “others” were  
288 0.5x and 0.9x less (P-values =  $5.3 \times 10^{-4}$ , 0.033); while the DHS and intronic were not significantly  
289 different (P-values >0.1). In addition, compared to the genome-wide average effect-size variance  
290 ( $\sigma_{avg}^2 = 0.024$ ), we found that the effect-size variance of the coding category was 1.9x larger (P-  
291 value=0.019; i.e., 1.4x larger effect-size); the DHS and intronic were 0.5x less (P-values = 0.011,  
292 0.007); while the promoter, intergenic, and “others” were not significantly different (P-values >0.1;  
293 Supplementary Figure 12(d)). Here, Fgwas identified a slightly different enrichment pattern  
294 (Supplementary Figure 11(b)), where UTR was identified as the second most enriched category.  
295 This is presumably because Fgwas assumes one causal variant per locus and tends to prioritize the  
296 variant with the smallest P-value in each locus, e.g., UTR variants *rs1142/KMT2E/SPRK2* and  
297 *rs10422209/CNN2* have the highest Fgwas PP and the smallest P-value in their respective locus  
298 (Supplementary Tables 2 and 8).

299

## 300 **Analysis with chromatin states**

301 Last, we considered the annotations of seven chromatin states obtained with ChromHMM in  
302 nine human cell types<sup>43</sup>: active promoter (APromoter), poised promoter (PPromoter), strong  
303 enhancer (SEnhancer), weak enhancer (WEnhancer), insulator, transcription elongation (TxnElong),  
304 repetitive/copy number variation (CNV). Nine human cell types include: embryonic stem cells (H1-  
305 hESC), erythrocytic leukaemia cells (K562), B-lymphoblastoid cells (GM12878), hepatocellular  
306 carcinoma cells (HepG2), umbilical vein endothelial cells (HUVEC), skeletal muscle myoblasts  
307 (HSMM), normal lung fibroblasts (NHLF), normal epidermal keratinocytes (NHEK) and mammary  
308 epithelial cells (HMEC).

309 With each set of chromatin states profiled in one cell type, we applied SFBA on the GWAS  
310 data of AMD, and then examined the list of variants that contribute 95% posterior probabilities in the  
311 identified loci with regional-PP >95%. We found that the results by accounting for the chromatin  
312 states profiled in the erythrocytic leukaemia cells (K562) gave the shortest list (average 14 variants  
313 per locus; Supplementary Table 17), and the enrichment analysis results of other cell types were  
314 slightly different (Supplementary Figures 13-15).

315 Here, we present the results of accounting for the chromatin states profiled in the K562 cell  
316 type (Figure 3(e, f); Supplementary Tables 11-14). Compared to the genome-wide average  
317 association probability ( $\pi_{avg} = 4.0 \times 10^{-6}$ ; Supplementary Figure 12(e)), the association probability  
318 was 7.8x higher for the active promoter category (P-value =  $7.4 \times 10^{-10}$ ), 3x higher for the strong  
319 enhancer category (P-value=0.013), 2.6x higher for the weak enhancer category (P-value = 0.002),  
320 1.8x higher for the transcription elongation category (P-value = 0.002), 0.4x less for the CNV  
321 category (P-values = 0.004). In addition, the effect-size variances of associated variants in active  
322 promoter and strong enhancer were found 2x larger than the genome-wide average ( $\sigma_{avg}^2 = 0.022$ ;  
323 P-values = 0.048, 0.073), while the effect-size variances of weak enhancer, transcription elongation,  
324 and CNV categories were not significantly different (P-values >0.1; Supplementary Figure 12(f)).

325 Note that the Bayesian enrichment estimates of the poised promoter and insulator categories  
326 are the same as their priors (not plotted in Figure 3(e, f)), suggesting that SFBA identified no

327 associations in these two categories. Again, Fgwas identified a similar enrichment pattern  
328 (Supplementary Figure 11(c)).

329

## 330 **DISCUSSION**

331 Here, we describe a scalable Bayesian hierarchical method, SFBA, for integrating functional  
332 information in GWASs to help prioritize functional associations and understand underlying genetic  
333 architecture. SFBA models both association probability and effect-size distribution as a function of  
334 annotation categories for improving fine-mapping resolution. Unlike previous methods<sup>26,27</sup>, SFBA  
335 accounts for LD and allows for the possibility of multiple association signals per locus while  
336 remaining capable of genome-wide inference. Further, SFBA employs an improved MCMC  
337 sampling strategy to greatly improve the mixing of MCMC samples, which ensures the capability of  
338 identifying a list of association candidates.

339 By simulation studies, we demonstrated that SFBA had higher power than Fgwas and  
340 conditioned P-value for identifying multiple signals in a single locus by accounting for both functional  
341 information and LD. We also showed that SFBA accurately estimated the enrichment patterns under  
342 scenarios with or without enrichment for one annotation in simulations. In the real analysis using the  
343 AMD GWAS data and three different types of annotations, by SFBA, we obtained posterior  
344 association probabilities and effect-size variances for variants of considered annotation categories,  
345 as well as an improved list of fine-mapped association signals. In addition, we replicated the  
346 findings of 32 out of 34 known AMD risk loci, as well as identified 5 potentially novel loci by SFBA.  
347 Further, we gave two fine-mapped AMD loci *C2/CFB/SKIV2L* and *C3* by SFBA as examples with  
348 justifications by haplotype analysis, model comparison, and previous findings. Thus, we believe our  
349 method is useful for understanding the underlying genetic architecture of complex traits and  
350 diseases, for efficiently integrating functional information into GWASs.

351 Our flexible framework allows for many further extensions. For example, it can be extended  
352 to deal with overlapping or quantitative annotations (Supplementary Information). These extensions  
353 will allow us to investigate the importance of a broader class of annotations (e.g. Combined  
354 Annotation Dependent Depletion (CADD) scores, MAF, and eQTL evidence). Importantly, as the

355 development of new genomic assays and computational tools enables new variant annotations,  
356 simultaneous modeling of available annotations will be critical to identify the set of annotations that  
357 are important for a specific trait. Then extending SFBA to select relevant annotations would be  
358 useful.

359 SFBA makes a key assumption that the variant correlation matrix has a block-wise structure,  
360 which allows us to segment the genome into approximately independent blocks, analyze variants  
361 per block by MCMC, and summarize genome-wide information by an EM algorithm. In parallel to our  
362 study, many recent studies have also explored the benefits of dividing the human genome into  
363 approximately independent LD blocks to facilitate genome-wide analyses<sup>26,52</sup>. Although the standard  
364 segmentation methods (e.g., based on genomic location<sup>52</sup> as we adopted here, or the number of  
365 variants per block<sup>26</sup>) are often sufficient in practice, we expect that a better segmentation method<sup>30</sup>  
366 based on LD blocks will likely further increase the association mapping power.

367 The biggest limitation of SFBA is probably computational cost, as we perform MCMC using  
368 the complete genotype data. Specifically, SFBA took 5,000 CPU hours (~5 hours with parallel  
369 computations on 1,000 CPUs for the 1,063 genome-blocks) to analyze the AMD GWAS data with  
370 33,976 individuals and 9,857,286 variants. Implementing SFBA with summary statistics is expected  
371 to reduce the computation cost significantly, which is part of our continuing project. In addition, the  
372 variational approximation<sup>53,54</sup> and other approximations<sup>55,56</sup> of MCMC may provide an efficient  
373 alternative for posterior inference in large GWAS.

## 374 **ONLINE METHODS**

### 375 **Bayesian variable selection regression model**

376 Our method is based on the standard Bayesian variable selection regression (BVSR) model

$$\mathbf{y}_{n \times 1} = \mathbf{X}_{n \times p} \boldsymbol{\beta}_{p \times 1} + \boldsymbol{\epsilon}_{n \times 1}, \quad \beta_i \sim \pi_i N(0, \tau^{-1} \sigma_i^2) + (1 - \pi_i) \delta_0(\beta_i), \quad \epsilon_i \sim N(0, \tau^{-1}),$$

377 where  $n$  denotes the number of individuals and  $p$  denotes the number of genetic variants;  $\mathbf{y}_{n \times 1}$  is  
378 the phenotype vector;  $\mathbf{X}_{n \times p}$  is the genotype matrix;  $\boldsymbol{\beta}_{p \times 1}$  is a vector of genetic effect-sizes where  
379 each element  $\beta_i$  follows a spike-and-slab prior (known as the point-normal distribution) ---- that is,  $\beta_i$   
380 follows a normal distribution  $N(0, \tau^{-1} \sigma_i^2)$  with probability  $\pi_i$ , or  $\beta_i$  is set as 0 with probability  $(1 - \pi_i)$   
381 and a point mass density function  $\delta_0(\beta_i)$  at 0 ( $\delta_0(\beta_i) = 1$  if  $\beta_i = 0$ ,  $\delta_0(\beta_i) = 0$  otherwise)<sup>32,33</sup>; and  $\epsilon_i$   
382 is the residual error that independently and identically follows a normal distribution  $N(0, \tau^{-1})$ . We  
383 assume that both the phenotype vector  $\mathbf{y}_{n \times 1}$  and columns of the genotype matrix  $\mathbf{X}_{n \times p}$  are  
384 centered, thus dropping the intercept. Although this model is developed for quantitative traits, we  
385 can treat binary phenotypes (e.g., cases and controls) as quantitative following previous  
386 approaches<sup>33,35</sup>.

### 387 **Bayesian hierarchical model accounting for functional information**

388 For integrating functional information into the above BVSR model, we classify all variants  
389 into disjoint categories by assuming one annotation per variant. We further assume that variants in  
390 the same functional category have the same spike-and-slab prior for the effect-sizes, i.e.,  $\pi_i =$   
391  $\pi_q, \sigma_i^2 = \sigma_q^2$  for the  $q$ th category. Consequently,  $\pi_q$  denotes the category specific causal probability  
392 and  $\sigma_q^2$  denotes the category specific effect-size variance (the square root of  $\sigma_q^2$  reflects the  
393 magnitude of effect size). Although we focus on discrete non-overlapping annotations in this paper,  
394 our method can be extended to overlapping and continuous annotations (Supplementary  
395 Information).

396 We assume a Bayesian hierarchical framework<sup>34</sup> of BVSR with the following independent  
397 hyper priors:

$$\pi_q \sim \text{Beta}(a_q, b_q), \quad \sigma_q^2 \sim \text{IG}(k_1, k_2), \quad \pi_q \perp \sigma_q^2,$$

398 where  $\pi_q$  follows a Beta distribution with positive shape parameters  $a_q$  and  $b_q$ ,  $\sigma_q^2$  follows an  
 399 Inverse-Gamma distribution with shape parameter  $k_1$  and scale parameter  $k_2$ . In order to adjust for  
 400 the unbalanced distribution of functional annotations among all variants and enforce a sparse model  
 401 in our analysis, we choose values for  $a_q$  and  $b_q$  such that the Beta distribution has mean  $\frac{a_q}{a_q+b_q} =$   
 402  $10^{-6}$  with  $(a_q + b_q)$  equal to the number of variants in category  $q$ . We set  $k_1 = k_2 = 0.1$  in our  
 403 analysis to induce non-informative prior for  $\sigma_q^2$ . Note that  $\tau$  is fixed at the phenotype variance value  
 404 in our Bayesian inferences (Supplementary Information).

#### 405 **Bayesian references**

406 We introduce a latent indicator vector  $\boldsymbol{\gamma}_{p \times 1}$  to facilitate computation, where each binary  
 407 element  $\gamma_i$  indicates whether  $\beta_i = 0$  by  $\gamma_i = 0$ , or  $\beta_i \sim N(0, \tau^{-1}\sigma_i^2)$  by  $\gamma_i = 1$ . Equivalently,

$$\gamma_i \sim \text{Bernoulli}(\pi_i), \quad \boldsymbol{\beta}_{-\boldsymbol{\gamma}} \sim \boldsymbol{\delta}_0, \quad \boldsymbol{\beta}_{\boldsymbol{\gamma}} \sim \text{MVN}_{|\boldsymbol{\gamma}|}(\mathbf{0}, \tau^{-1}\mathbf{V}_{\boldsymbol{\gamma}}),$$

408 where  $|\boldsymbol{\gamma}|$  denotes the number of 1's in  $\boldsymbol{\gamma}$ ;  $\boldsymbol{\beta}_{-\boldsymbol{\gamma}}$  denotes the sub-vector of  $\boldsymbol{\beta}_{p \times 1}$  corresponding to  
 409 variants with  $\gamma_i = 0$ ;  $\boldsymbol{\beta}_{\boldsymbol{\gamma}}$  denotes the sub-vector of  $\boldsymbol{\beta}_{p \times 1}$  corresponding to variants with  $(\gamma_j = 1; j =$   
 410  $1, \dots, |\boldsymbol{\gamma}|)$ ; and  $\mathbf{V}_{\boldsymbol{\gamma}}$  denotes the sub-matrix of the diagonal matrix  $\mathbf{V}_{p \times p}$  whose  $i$ th diagonal element is  
 411  $V_{ii} = \sigma_i^2$ . Consequently, the expectation of  $\gamma_i$  is an estimate of the posterior inclusion probability  
 412 (PP) for the  $i$ th variant,  $E[\gamma_i] = \text{Prob}(\gamma_i = 1) = PP_i$ .

413 For the described Bayesian hierarchical model above, the posterior joint distribution is  
 414 proportional to

$$P(\boldsymbol{\beta}, \boldsymbol{\gamma}, \boldsymbol{\pi}, \boldsymbol{\sigma}^2, \tau \mid \mathbf{y}, \mathbf{X}, \mathbf{A}) \propto P(\mathbf{y} \mid \mathbf{X}, \boldsymbol{\beta}, \boldsymbol{\gamma}, \tau) P(\boldsymbol{\beta}, \mathbf{A}, \boldsymbol{\pi}, \boldsymbol{\sigma}^2, \boldsymbol{\gamma}, \tau) P(\boldsymbol{\gamma} \mid \boldsymbol{\pi}) P(\boldsymbol{\pi}) P(\boldsymbol{\sigma}^2) P(\tau),$$

415 where  $\boldsymbol{\pi} = (\pi_1, \dots, \pi_Q)^T$ ,  $\boldsymbol{\sigma}^2 = (\sigma_1^2, \dots, \sigma_Q^2)^T$ ,  $\mathbf{A}$  is the  $p \times Q$  matrix of binary annotations, and  $Q$  is the  
 416 total number of annotations. The goal is to estimate the category specific parameters  $(\boldsymbol{\pi}, \boldsymbol{\sigma}^2)$  and  
 417 the variant specific parameters  $(\boldsymbol{\beta}, E[\boldsymbol{\gamma}])$  from their posterior distributions, conditioning on the data



418  $(\boldsymbol{y}, \boldsymbol{X}, \boldsymbol{A})$ . Here, the category specific parameters denote the shared characteristics among all  
419 variants with the same annotation, which are also called enrichment parameters.

#### 420 **EM-MCMC algorithm**

421 The basic idea of the EM-MCMC algorithm is to segment the whole genome into  
422 approximately independent blocks each with 5,000 ~ 10,000 variants; run MCMC algorithm per  
423 block with fixed category specific parameter values  $(\boldsymbol{\pi}, \boldsymbol{\sigma}^2)$  to obtain posterior estimates of  $(\boldsymbol{\beta}, E[\boldsymbol{\gamma}])$   
424 (E-step); then summarize the genome-wide posterior estimates of  $(\boldsymbol{\beta}, E[\boldsymbol{\gamma}])$  and update values of  
425  $(\boldsymbol{\pi}, \boldsymbol{\sigma}^2)$  by maximizing their posterior likelihoods (M-step). Repeat such EM-MCMC iterations for a  
426 few times until the estimates of  $(\boldsymbol{\pi}, \boldsymbol{\sigma}^2)$  (maximum a posteriori estimates, i.e., MAPs) converge  
427 (Supplementary Figure 1).

428 We derive the log-posterior-likelihood functions for  $(\boldsymbol{\pi}, \boldsymbol{\sigma}^2)$  and the analytical formulas for  
429 their MAPs. In addition, we construct their confidence intervals using Fisher information, whose  
430 analytical forms are derived for our Bayesian hierarchical model (Supplement Information). In our  
431 practical analyses, we find that, in general, with about 5 EM iterations, the estimates for  $(\boldsymbol{\pi}, \boldsymbol{\sigma}^2)$   
432 would achieve convergence. Our method of conducting GWAS with functional information by using  
433 the above Bayesian hierarchical model and EM-MCMC algorithm is referred as “Scalable Functional  
434 Bayesian Association” (SFBA).

#### 435 **Convergence diagnosis**

436 Here, the MCMC algorithm is essentially a random walk over all possible linear regression  
437 models with combinations of variants, which can start with either a model containing multiple  
438 significant variants by sequential conditional analysis or the most significant variant by P-value. In  
439 each MCMC iteration, a new model is proposed by including an additional variant, or deleting one  
440 variant from the current model, or switching one variant within the current model with one outside;  
441 and then up to acceptance or rejection by the Metropolis-Hastings algorithm (Supplementary  
442 Information). Importantly, we refine the standard proposal strategy for the switching step, by  
443 prioritizing variants in the neighborhood of the switch candidate according to their conditional

444 association evidence (e.g., P-values conditioning on variants, except the switch candidate, in the  
445 current model). As a result, this MCMC algorithm encourages our method to explore different  
446 combinations of potentially causal variants in each locus, and significantly improves the mixing  
447 property.

448 We used the potential scale reduction factor (PSRF)<sup>57</sup> to quantitatively diagnose MCMC  
449 mixing property. PSRF is essentially a ratio between the average within-chain variance of the  
450 posterior samples and the overall-chain variance with multiple MCMC chains. From the example  
451 plots of the PSRFs of Bayesian PPs (Supplementary Figure 2), for 58 top marginally significant  
452 SNPs (with P-values  $<5 \times 10^{-8}$ ) in the WTCCC GWAS data of Crohn's disease<sup>1</sup>, we can see that  
453 about half of the PSRF values by the standard MCMC algorithm (used in GEMMA<sup>35</sup>) exceed 1.2,  
454 suggesting the standard MCMC algorithm has poor mixing property. In contrast, the PSRF values  
455 by our MCMC algorithm are within the range of (0.9, 1.2), suggesting that our MCMC algorithm has  
456 greatly improved mixing property.

## 457 **Computational technics**

458 We employ two computational technics to save memory in the SFBA software. One is to  
459 save all genotype data as unsigned characters in memory, because unsigned characters are  
460 equivalent to unsigned integers in [0, 256] that can be easily converted to genotype values within  
461 the range of (0.0, 2.0) by multiplying with 0.01. This technic saves up to 90% memory comparing  
462 with saving genotypes in double type. Second, with an option of in-memory compression, SFBA will  
463 further save additional 70% memory. As a result, we can decrease the memory usage from ~120  
464 GB (usage by GEMMA<sup>35</sup>) to ~3.6GB, for a typical GWAS dataset with ~33K individuals and ~500K  
465 variants.

466 The SFBA software wraps a C++ executable file for the E-step (MCMC algorithm) and an R  
467 script for the M-step together by a Makefile, which is generated by a Perl script and enables parallel  
468 computation through submitting jobs. Generally, 50K MCMC iterations with ~5K variants and ~33K  
469 individuals take about 300MB memory and 1hr CPU time on a 1.6GHz core, where the computation

470 cost is of order  $O(nm^2)$  with the sample size ( $n$ ) and number of variants ( $m$ ) considered in the linear  
471 models during MCMC iterations (usually  $m < 10$ ). The computation cost for M-step is almost  
472 negligible because of analytical formulas for the MAPs.

### 473 **Fgwas**

474 In this paper, the Fgwas results were generated by using summary statistics from single  
475 variant likelihood-ratio tests and the same annotation information used by SFBA. Fgwas<sup>26</sup> produces  
476 variant-specific posterior association probabilities (PPs), segment-specific PPs, and enrichment  
477 estimates for all annotations. To avoid the issue of failing convergence, we used segment size of  
478 2,000 variants for Fgwas in both simulations and real data analyses. As a result, the final Fgwas PP  
479 is given by the product of the variant-specific PP and the corresponding segment-specific PP, and  
480 the Fgwas regional-PP is given by the highest segment-specific PP in a region or genome block.

### 481 **Simulation data**

482 We used genotype data on Chromosome 20-22 from the AMD GWAS (33,976 individuals  
483 and 241,500 variants with MAF>0.1) to simulate quantitative phenotypes from the standard linear  
484 regression model  $y_i = \mathbf{X}_i^T \boldsymbol{\beta} + \epsilon_i$ ,  $i = 1, \dots, 33976$ , where  $\mathbf{X}_i$  is the genotype vector of the  $i$ th  
485 individual and  $\epsilon_i$  is the noise term generated from  $N(0, \sigma_\epsilon^2)$ . We segmented the genotype data into  
486 50x2.5Mb blocks each with ~5,000 variants. Within each block, we marked a ~25Kb continuous  
487 region (starting 37.5Kb from the beginning of a block) as the causal locus and randomly selected  
488 two causal SNPs per locus. Two complementary annotations (“coding” vs. “noncoding”) were  
489 simulated, where the coding variants account for ~1% overall variants but ~10% variants within the  
490 causal loci (matching the pattern in the real AMD analysis). We selected positive effect-size vector  
491  $\boldsymbol{\beta}$  and noise variance  $\sigma_\epsilon^2$  such that a total of 15% phenotypic variance was equally explained by  
492 causal SNPs. We controlled the enrichment-fold of coding variants by varying the number of coding  
493 variants among these 100 causal SNPs.

494 We compared SFBA with P-value, conditioned P-value, and Fgwas. In the simulation  
495 studies, P-values were obtained from a series of likelihood-ratio tests based on the standard linear  
496 regression model. P-values conditioning on the top significant variant per locus were used to identify

497 the second signal by conditional analysis. Fgwas was implemented with summary statistics from  
498 single variant tests and the segment size of 2,000 variants (selected to avoid convergence issues).  
499 We failed to include PAINTOR in the comparison, because PAINTOR cannot complete the analysis  
500 for one block in >1,000 CPU hours (on a 2.5GHz, 64-bit CPU) and is thus expected to require >1  
501 million CPU hours for a genome-wide analysis.

## 502 **GWAS data of AMD**

503 In the GWAS data of AMD, the advanced AMD cases – including wet cases with choroidal  
504 neovascularization (CNV, when accompanied by angiogenesis) and dry cases with geographic  
505 atrophy (GA, when angiogenesis is absent) – and control subjects were gathered across 26 studies,  
506 with DNA samples collected and genotyped centrally<sup>39</sup>. All genotypes were generated by a  
507 customized chip that contains (i) the usual genome-wide variant content, (ii) exome content  
508 comparable to the Exome chip (protein-altering variants across all exons), (iii) variants in known  
509 AMD risk loci (protein-altering variants and previously associated variants), and (iv) previously  
510 observed and predicted variation in *TIMP3* and *ABCA4* (two genes implicated in monogenic retinal  
511 dystrophies). The genotyped variants (439,350) were then imputed to the 1000 Genomes reference  
512 panel (Phase I)<sup>40</sup>, resulting a total of 12,023,830 variants.

513 SFBA used dosage genotype data and standardized phenotypes. Phenotypes were first  
514 coded quantitatively with 1's for cases and 0's for controls; second corrected for the first and second  
515 principle components, age, gender, and source of DNA samples; and then standardized to have  
516 mean 0 and standard deviation 1. In order to make the Bayesian inferences scalable to the AMD  
517 GWAS data (33,976 individuals, 9,866,744 variants with MAF >0.5%), we segmented the whole  
518 genome into 1,063 non-overlapped blocks, such that each block has length ~2.5Mb (containing  
519 ~10,000 variants) and all previously identified loci along with variants in LD ( $R^2 > 0.1$ ) were not split.  
520 Then we applied the EM-MCMC algorithm with 5 EM steps and 50,000 MCMC iterations (including  
521 50,000 extra burn-ins).

522 For comparison, P-values were obtained by a series of likelihood-ratio tests, using the same  
523 “quantitative” phenotype vector as used by SFBA; Fgwas was implemented with the summary  
524 statistics from single variant tests and the segment size of 2,000 variants (resulting 4,934

525 segments); and a standard Bayesian variable selection regression (BVSR) method that models no  
526 functional information was also applied.

527 Three types of genomic annotations were considered for analyzing the AMD data: gene-  
528 based functional annotations of SNPs and small indels from SeattleSeq  
529 (<http://snp.gs.washington.edu/SeattleSeqAnnotation138/index.jsp>), summarized regulatory  
530 annotations<sup>41</sup>, and the chromatin states profiled respectively in nine human cell types from  
531 chromHMM<sup>19,42,43</sup>. For variants annotated with multiple functions, we used the most severe function  
532 in the analysis: non-synonymous > coding-synonymous > other-genomic > intronic > intergenic for  
533 the gene-based annotations; coding > UTR > promoter > DHS > intronic > intergenic > “others” for  
534 the summarized regulatory annotations; active promoter > poised promoter > strong enhancer >  
535 weak enhancer > insulator > transcription elongation > CNV for the chromatin states.

#### 536 **Software**

537 Our software SFBA is freely available on Github (<https://github.com/yjingj/SFBA>).

#### 538 **ACKNOWLEDGMENTS**

539 XZ is supported by startup funds from the University of Michigan and a grant from the  
540 Foundation for the National Institutes of Health through the Accelerating Medicines Partnership  
541 (BOEH15AMP, co-PIs M. Boehnke and G. Abecasis).

#### 542 **COMPETING FINANCIAL INTERESTS**

543 None.

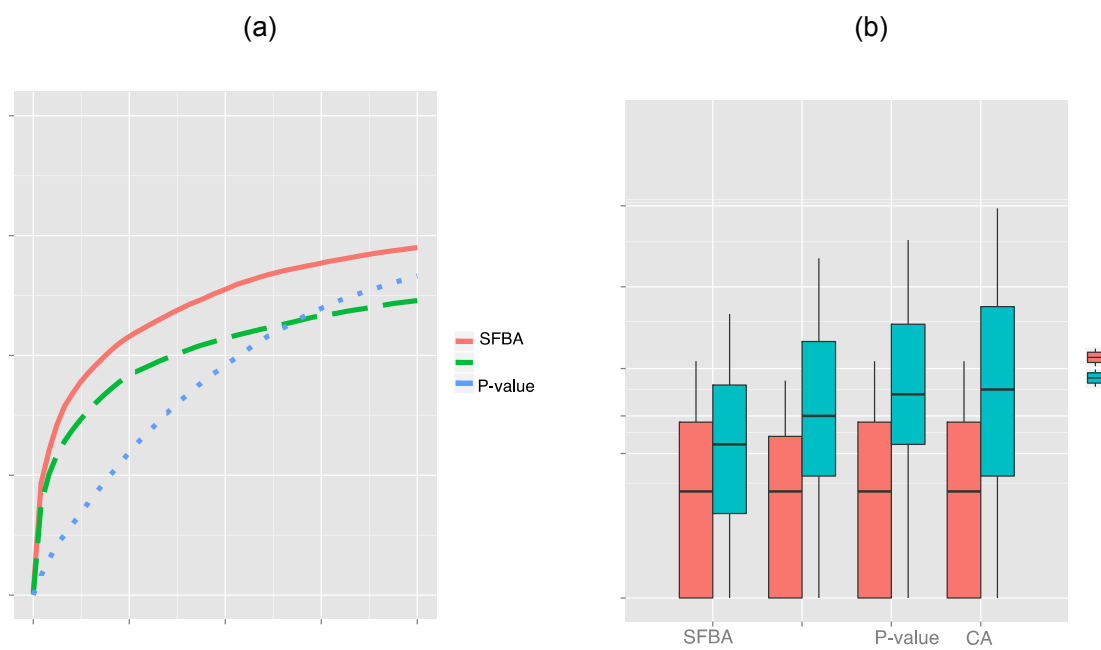

544 **Figure 1: (a) Average ROC curves of Bayesian PP by SFBA, Fgwas PP, and P-value, and (b) boxplot of the ranks**  
545 **of the true causal SNP1 (with smaller P-value) and SNP2 by SFBA, Fgwas, P-value, and conditional analysis (CA),**  
546 **with 100 simulation replicates and the complete sample size 33,976.**

547

548

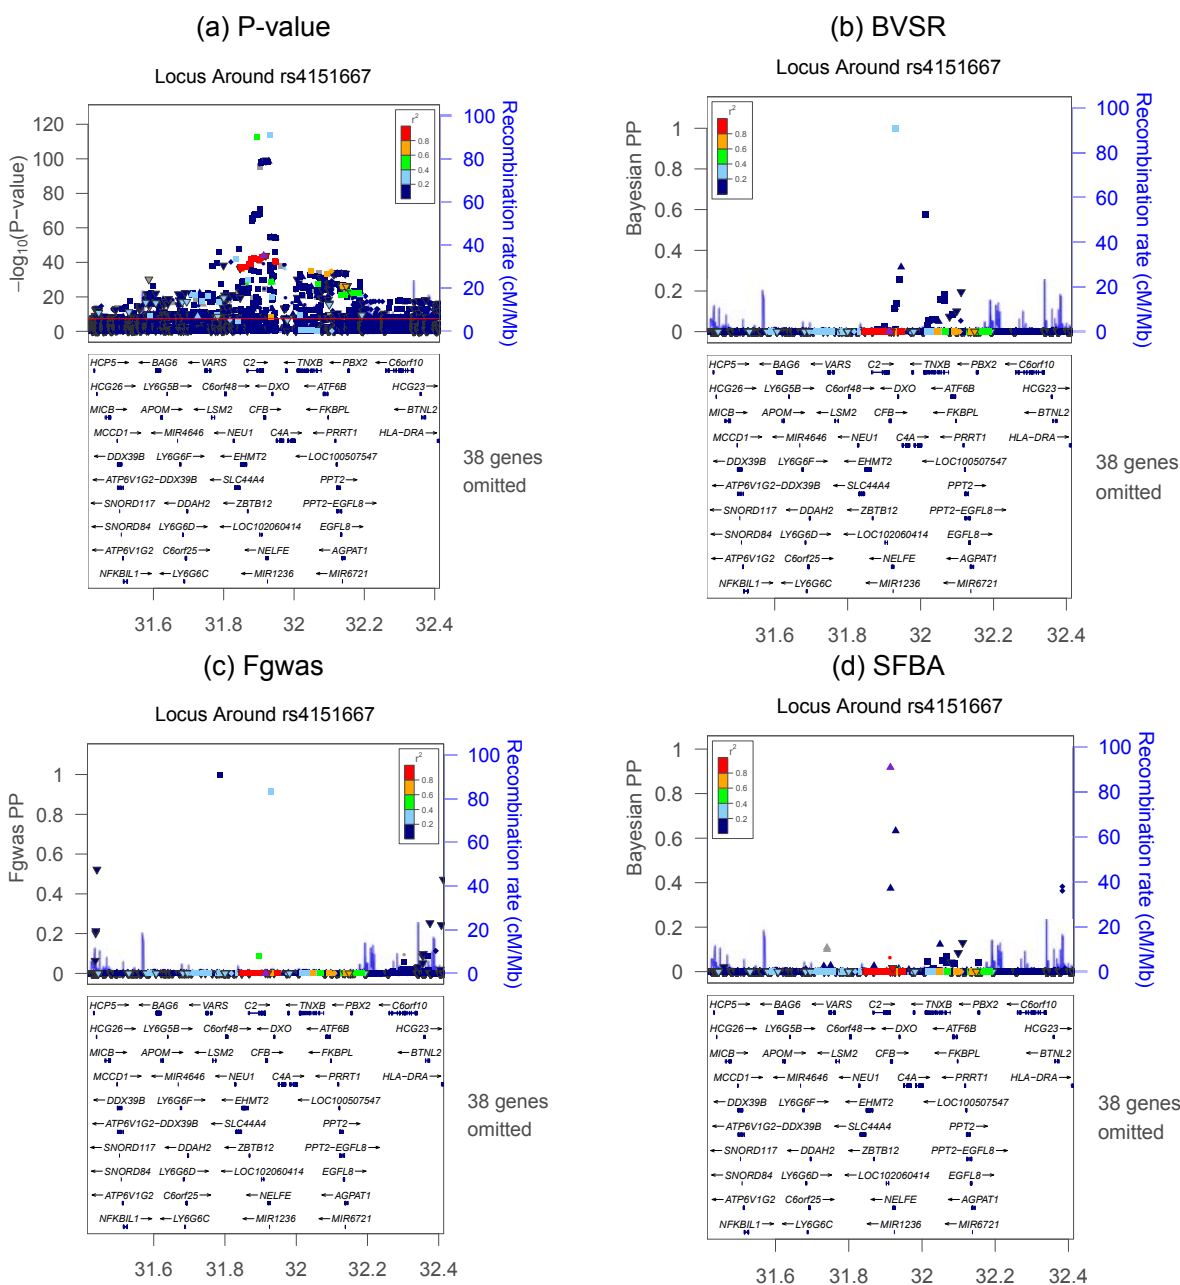

549 **Figure 2: ZoomLocus plots with P-values by single variant tests (a), Bayesian PPs by BVSR (b), Fgwas PPs (c),**  
 550 **and Bayesian PPs by SFBA (d); the top cyan squares in panels (a, b, c) denote the intronic variant *rs116503776*;**  
 551 **the purple triangle in (d) denotes the non-synonymous variant *rs4151667*; shapes denote different annotations**  
 552 **(triangle point up  $\Delta$  for non-syn, circle  $\circ$  for coding-syn, square  $\square$  for intronic, diamond  $\diamond$  for intergenic, and**  
 553 **triangle point down  $\nabla$  for other-genomic).**

554

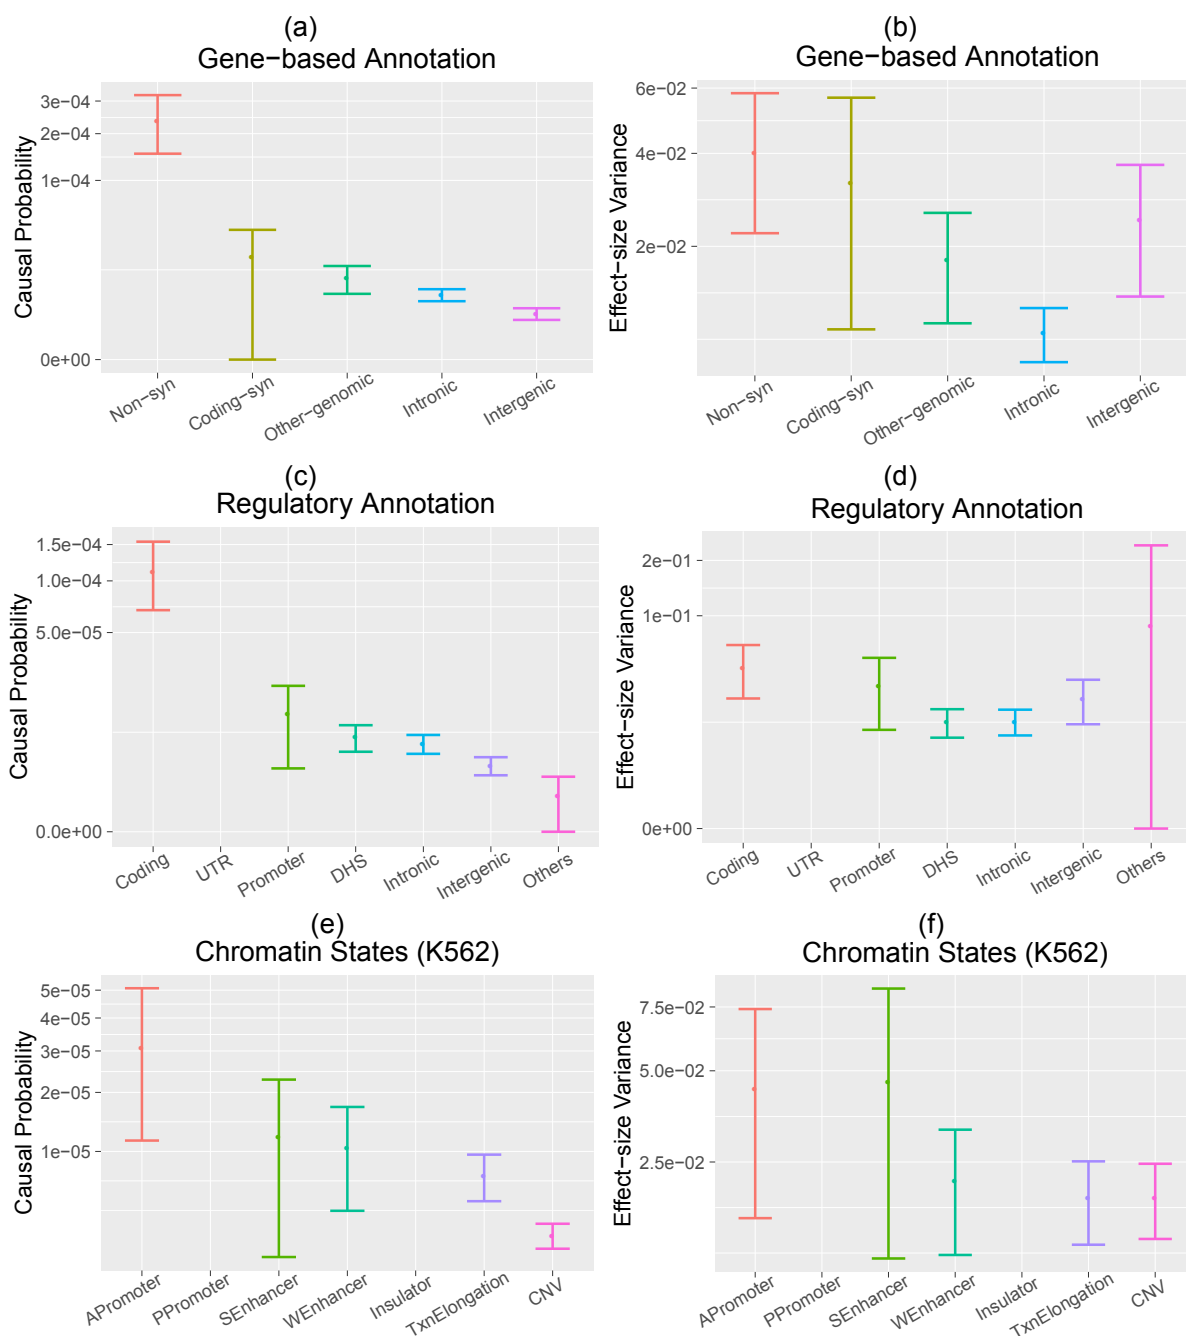

555 **Figure 3: Category specific (enrichment) parameter estimates with 95% error bars by SFBA, panels (a, c, e) for**  
 556 **causal probabilities and panels (b, d, f) for effect-size variances, with 3 sets of annotations. The estimates that are**  
 557 **the same as their priors are not plotted: estimates of UTR in (c, d), estimates of the active/poised promoter in (e, f).**  
 558 **Note that the estimate of the effect-size variance for the “Others” category in (d) is also close to the prior because**  
 559 **of low region-association evidence, hence it has a wide 95% error bar.**  
 560

561



## 562 REFERENCES (Limited to 30)

- 563 1. Wellcome Trust Case Control C. Genome-wide association study of 14,000 cases of seven common  
564 diseases and 3,000 shared controls. *Nature* 2007;447:661-78.
- 565 2. McCarthy MI, Abecasis GR, Cardon LR, et al. Genome-wide association studies for complex traits:  
566 consensus, uncertainty and challenges. *Nature reviews Genetics* 2008;9:356-69.
- 567 3. Voight BF, Scott LJ, Steinthorsdottir V, et al. Twelve type 2 diabetes susceptibility loci identified  
568 through large-scale association analysis. *Nature genetics* 2010;42:579-89.
- 569 4. Visscher PM, Brown MA, McCarthy MI, Yang J. Five years of GWAS discovery. *American journal of*  
570 *human genetics* 2012;90:7-24.
- 571 5. Global Lipids Genetics C, Willer CJ, Schmidt EM, et al. Discovery and refinement of loci associated  
572 with lipid levels. *Nature genetics* 2013;45:1274-83.
- 573 6. Hirschhorn JN, Daly MJ. Genome-wide association studies for common diseases and complex  
574 traits. *Nature reviews Genetics* 2005;6:95-108.
- 575 7. Yu J, Pressoir G, Briggs WH, et al. A unified mixed-model method for association mapping that  
576 accounts for multiple levels of relatedness. *Nature genetics* 2006;38:203-8.
- 577 8. Hindorf LA, Sethupathy P, Junkins HA, et al. Potential etiologic and functional implications of  
578 genome-wide association loci for human diseases and traits. *Proceedings of the National Academy of*  
579 *Sciences of the United States of America* 2009;106:9362-7.
- 580 9. Yang J, Ferreira T, Morris AP, et al. Conditional and joint multiple-SNP analysis of GWAS summary  
581 statistics identifies additional variants influencing complex traits. *Nature genetics* 2012;44:369-75, S1-3.
- 582 10. Carithers LJ, Moore HM. The Genotype-Tissue Expression (GTEx) Project. *Biopreservation and*  
583 *biobanking* 2015;13:307-8.
- 584 11. Dixon JR, Jung I, Selvaraj S, et al. Chromatin architecture reorganization during stem cell  
585 differentiation. *Nature* 2015;518:331-6.
- 586 12. Kellis M, Wold B, Snyder MP, et al. Defining functional DNA elements in the human genome.  
587 *Proceedings of the National Academy of Sciences of the United States of America* 2014;111:6131-8.
- 588 13. Kumar P, Henikoff S, Ng PC. Predicting the effects of coding non-synonymous variants on protein  
589 function using the SIFT algorithm. *Nature protocols* 2009;4:1073-81.
- 590 14. Adzhubei I, Jordan DM, Sunyaev SR. Predicting functional effect of human missense mutations  
591 using PolyPhen-2. *Current protocols in human genetics / editorial board, Jonathan L Haines [et al]*  
592 *2013;Chapter 7:Unit7 20.*
- 593 15. Pickrell JK, Marioni JC, Pai AA, et al. Understanding mechanisms underlying human gene  
594 expression variation with RNA sequencing. *Nature* 2010;464:768-72.
- 595 16. Tung J, Zhou X, Alberts SC, Stephens M, Gilad Y. The genetic architecture of gene expression levels  
596 in wild baboons. *eLife* 2015;4.
- 597 17. Lea AJ, Tung J, Zhou X. A Flexible, Efficient Binomial Mixed Model for Identifying Differential DNA  
598 Methylation in Bisulfite Sequencing Data. *PLoS genetics* 2015;11:e1005650.
- 599 18. Pique-Regi R, Degner JF, Pai AA, Gaffney DJ, Gilad Y, Pritchard JK. Accurate inference of  
600 transcription factor binding from DNA sequence and chromatin accessibility data. *Genome research*  
601 *2011;21:447-55.*
- 602 19. Ernst J, Kellis M. ChromHMM: automating chromatin-state discovery and characterization. *Nature*  
603 *methods* 2012;9:215-6.
- 604 20. McVicker G, van de Geijn B, Degner JF, et al. Identification of Genetic Variants That Affect Histone  
605 Modifications in Human Cells. *Science* 2013;342:747-9.
- 606 21. Cooper GM, Stone EA, Asimenos G, et al. Distribution and intensity of constraint in mammalian  
607 genomic sequence. *Genome research* 2005;15:901-13.
- 608 22. Kircher M, Witten DM, Jain P, O'Roak BJ, Cooper GM, Shendure J. A general framework for  
609 estimating the relative pathogenicity of human genetic variants. *Nature genetics* 2014;46:310-5.
- 610 23. Finucane HKaB-S, Brendan and Gusev, Alexander and Trynka, Gosia and Reshef, Yakir and Loh, Po-  
611 Ru and Anttila, Verner and Xu, Han and Zang, Chongzhi and Farh, Kyle and Ripke, Stephan and Day, Felix R  
612 and ReproGen Consortium and Schizophrenia Working Group of the Psychiatric Genomics Consortium and

- 613 The RACI Consortium and Purcell, Shaun and Stahl, Eli and Lindstrom, Sara and Perry, John R B and Okada,  
614 Yukinori and Raychaudhuri, Soumya and Daly, Mark J and Patterson, Nick and Neale, Benjamin M and  
615 Price, Alkes L. Partitioning heritability by functional annotation using genome-wide association summary  
616 statistics. *Nature genetics* 2015;47:1228--35.
- 617 24. Zhou X. A Unified Framework for Variance Component Estimation with Summary Statistics in  
618 Genome-wide Association Studies. *bioRxiv* 2016.
- 619 25. Schork AJ, Thompson WK, Pham P, et al. All SNPs are not created equal: genome-wide association  
620 studies reveal a consistent pattern of enrichment among functionally annotated SNPs. *PLoS genetics*  
621 2013;9:e1003449.
- 622 26. Pickrell JK. Joint analysis of functional genomic data and genome-wide association studies of 18  
623 human traits. *American journal of human genetics* 2014;94:559-73.
- 624 27. Kichaev G, Yang WY, Lindstrom S, et al. Integrating functional data to prioritize causal variants in  
625 statistical fine-mapping studies. *PLoS genetics* 2014;10:e1004722.
- 626 28. Gabriel SB, Schaffner SF, Nguyen H, et al. The structure of haplotype blocks in the human genome.  
627 *Science* 2002;296:2225-9.
- 628 29. Wall JD, Pritchard JK. Haplotype blocks and linkage disequilibrium in the human genome. *Nature*  
629 *reviews Genetics* 2003;4:587-97.
- 630 30. Berisa T, Pickrell JK. Approximately independent linkage disequilibrium blocks in human  
631 populations. *Bioinformatics* 2016;32:283-5.
- 632 31. Fritsche LG, Igl W, Bailey JN, et al. A large genome-wide association study of age-related macular  
633 degeneration highlights contributions of rare and common variants. *Nature genetics* 2015.
- 634 32. Chipman H, George EI, McCulloch RE. The Practical Implementation of Bayesian Model Selection.  
635 In: Lahiri P, ed. *Model selection*. Beachwood, OH: Institute of Mathematical Statistics; 2001:65-116.
- 636 33. Guan Y, Stephens M. Bayesian variable selection regression for genome-wide association studies  
637 and other large-scale problems. 2011:1780-815.
- 638 34. Carbonetto P, Stephens M. Integrated enrichment analysis of variants and pathways in genome-  
639 wide association studies indicates central role for IL-2 signaling genes in type 1 diabetes, and cytokine  
640 signaling genes in Crohn's disease. *PLoS genetics* 2013;9:e1003770.
- 641 35. Zhou X, Carbonetto P, Stephens M. Polygenic modeling with bayesian sparse linear mixed models.  
642 *PLoS genetics* 2013;9:e1003264.
- 643 36. Marchini J, Howie B, Myers S, McVean G, Donnelly P. A new multipoint method for genome-wide  
644 association studies by imputation of genotypes. *Nature genetics* 2007;39:906-13.
- 645 37. Wen X, Stephens M. Bayesian Methods for Genetic Association Analysis with Heterogeneous  
646 Subgroups: From Meta-Analyses to Gene-Environment Interactions. *The annals of applied statistics*  
647 2014;8:176-203.
- 648 38. Zhou X, Stephens M. Genome-wide efficient mixed-model analysis for association studies. *Nature*  
649 *genetics* 2012;44:821-4.
- 650 39. Fritsche LG, Igl W, Cooke Bailey JN, et al. Insights into Rare and Common Genetic Variation From a  
651 Large Study of Age-Related Macular Degeneration. *Nature genetics* in press.
- 652 40. Genomes Project C, Auton A, Brooks LD, et al. A global reference for human genetic variation.  
653 *Nature* 2015;526:68-74.
- 654 41. Gusev A, Lee SH, Trynka G, et al. Partitioning heritability of regulatory and cell-type-specific  
655 variants across 11 common diseases. *American journal of human genetics* 2014;95:535-52.
- 656 42. Ernst J, Kellis M. Discovery and characterization of chromatin states for systematic annotation of  
657 the human genome. *Nature biotechnology* 2010;28:817-25.
- 658 43. Ernst J, Kheradpour P, Mikkelsen TS, et al. Mapping and analysis of chromatin state dynamics in  
659 nine human cell types. *Nature* 2011;473:43-9.
- 660 44. Chauhan L, Jenkins GD, Bhise N, et al. Genome-wide association analysis identified splicing single  
661 nucleotide polymorphism in CFLAR predictive of triptolide chemo-sensitivity. *BMC genomics* 2015;16:483.

- 662 45. Fransen E, Bonneux S, Corneveaux JJ, et al. Genome-wide association analysis demonstrates the  
663 highly polygenic character of age-related hearing impairment. *European journal of human genetics : EJHG*  
664 2015;23:110-5.
- 665 46. Masson D, Jiang XC, Lagrost L, Tall AR. The role of plasma lipid transfer proteins in lipoprotein  
666 metabolism and atherogenesis. *Journal of lipid research* 2009;50 Suppl:S201-6.
- 667 47. Kettunen J, Tukiainen T, Sarin AP, et al. Genome-wide association study identifies multiple loci  
668 influencing human serum metabolite levels. *Nature genetics* 2012;44:269-76.
- 669 48. Nikpay M, Goel A, Won HH, et al. A comprehensive 1,000 Genomes-based genome-wide  
670 association meta-analysis of coronary artery disease. *Nature genetics* 2015;47:1121-30.
- 671 49. Helgason H, Sulem P, Duvvari MR, et al. A rare nonsynonymous sequence variant in C3 is  
672 associated with high risk of age-related macular degeneration. *Nature genetics* 2013;45:1371-4.
- 673 50. Seddon JM, Yu Y, Miller EC, et al. Rare variants in CFI, C3 and C9 are associated with high risk of  
674 advanced age-related macular degeneration. *Nature genetics* 2013;45:1366-70.
- 675 51. Zhan X, Larson DE, Wang C, et al. Identification of a rare coding variant in complement 3  
676 associated with age-related macular degeneration. *Nature genetics* 2013;45:1375-9.
- 677 52. Loh PR, Bhatia G, Gusev A, et al. Contrasting genetic architectures of schizophrenia and other  
678 complex diseases using fast variance-components analysis. *Nature genetics* 2015;47:1385-92.
- 679 53. Jordan MI, Ghahramani Z, Jaakkola TS, Saul LK. An Introduction to Variational Methods for  
680 Graphical Models. *Machine Learning* 1999;37:183-233.
- 681 54. Carbonetto P, Stephens M. Scalable Variational Inference for Bayesian Variable Selection in  
682 Regression, and Its Accuracy in Genetic Association Studies. 2012:73-108.
- 683 55. Rue H, Martino S, Chopin N. Approximate Bayesian inference for latent Gaussian models by using  
684 integrated nested Laplace approximations. *Journal of the Royal Statistical Society: Series B (Statistical*  
685 *Methodology)* 2009;71:319-92.
- 686 56. Singh SaW, Michael and McCallum, Andrew. Monte Carlo MCMC: efficient inference by  
687 approximate sampling: Association for Computational Linguistics; 2012.
- 688 57. Gelman A, Rubin DB. Inference from Iterative Simulation Using Multiple Sequences. *Statistical*  
689 *Science* 1992;7:457-72.

690

691

**Supplementary Table 1: Classification of gene-based functional annotations.**

| Native gene-based functional annotations                                                                                | Annotation categories considered in the analysis |
|-------------------------------------------------------------------------------------------------------------------------|--------------------------------------------------|
| frameshift, frameshift-near-splice                                                                                      | Non-synonymous                                   |
| splice-acceptor, splice-donor,                                                                                          |                                                  |
| stop-gained, stop-gained-near-splice, stop-lost                                                                         |                                                  |
| missense, missense-near-splice                                                                                          |                                                  |
| synonymous-near-splice, non-coding-exon-near-splice, coding-near-splice, coding-unknown-near-splice, intron-near-splice |                                                  |
| coding, coding-unknown, synonymous, nc-transcript-variant                                                               | Coding-synonymous                                |
| intronic                                                                                                                | Intronic                                         |
| intergenic, NAs                                                                                                         | Intergenic                                       |
| 3-prime-UTR, 5-prime-UTR,                                                                                               | Other-genomic                                    |
| downstream-gene, upstream-gene, non-coding-exon                                                                         |                                                  |

**Supplementary Table 2: Compare results by P-value (single variant test), Fgwas, and SFBA in the known 34 AMD loci, accounting for gene-based functional annotations.**

| Known 34 Loci        |     |             |             | Top significant variant by P-value |               |       |                        |               | Bayesian Regional-PP | Fgwas Regional-PP |
|----------------------|-----|-------------|-------------|------------------------------------|---------------|-------|------------------------|---------------|----------------------|-------------------|
| Locus name           | Chr | Start       | End         | dbSNPID                            | Chr:Position  | MAF   | P-value                | Anno          |                      |                   |
| <i>CFH</i>           | 1   | 195,679,832 | 197,768,053 | rs10922109                         | 1:196,704,632 | 0.329 | $<9 \times 10^{-321}$  | intronic      | 1.000                | 1.000             |
| <i>COL4A3</i>        | 2   | 227,573,015 | 228,592,110 | rs11884770                         | 2:228,086,920 | 0.731 | $5.6 \times 10^{-9}$   | intronic      | 0.984                | 0.986             |
| <i>ADAMTS9-AS</i>    | 3   | 64,199,445  | 65,230,121  | rs62247658                         | 3:64,715,155  | 0.551 | $1.4 \times 10^{-15}$  | intronic      | 0.978                | 1.000             |
| <i>COL8A1</i>        | 3   | 98,551,114  | 100,381,567 | rs140647181                        | 3:99,180,668  | 0.019 | $5.4 \times 10^{-13}$  | intergenic    | 1.000                | 0.999             |
| <i>CFI</i>           | 4   | 110,126,506 | 111,185,820 | rs10033900                         | 4:110,659,067 | 0.506 | $7.1 \times 10^{-19}$  | downstream    | 1.000                | 1.000             |
| <i>C9</i>            | 5   | 38,699,134  | 39,831,894  | rs62358361                         | 5:39,327,888  | 0.012 | $3.1 \times 10^{-16}$  | intronic      | 1.000                | 1.000             |
| <i>PRLR/SPEF2</i>    | 5   | 34,769,332  | 36,493,378  | rs114092250                        | 5:35,494,448  | 0.018 | $2.5 \times 10^{-9}$   | intergenic    | 0.961                | 0.987             |
| <i>C2/CFB/SKIV2L</i> | 6   | 30,505,490  | 33,238,589  | rs116503776                        | 6:31,930,462  | 0.120 | $2.1 \times 10^{-114}$ | intronic      | 1.000                | 1.000             |
| <i>VEGFA</i>         | 6   | 43,305,296  | 44,329,629  | rs943080                           | 6:43,826,627  | 0.518 | $2.0 \times 10^{-16}$  | intergenic    | 1.000                | 1.000             |
| <i>KMT2E/SRPK2</i>   | 7   | 104,081,402 | 105,563,372 | rs1142                             | 7:104,756,326 | 0.357 | $1.5 \times 10^{-10}$  | downstream    | 0.999                | 0.999             |
| <i>PILRB/PILRA</i>   | 7   | 99,394,940  | 100,611,776 | rs7803454                          | 7:99,991,548  | 0.199 | $3.6 \times 10^{-10}$  | intronic      | 0.999                | 0.999             |
| <i>TNFRSF10B</i>     | 8   | 22,582,971  | 23,588,984  | rs79037040                         | 8:23,080,971  | 0.534 | $2.9 \times 10^{-12}$  | nc-transcript | 1.000                | 0.999             |
| <i>MIR6130/RORB</i>  | 9   | 75,935,160  | 77,189,752  | rs10781180                         | 9:76,615,662  | 0.683 | $3.0 \times 10^{-10}$  | intergenic    | 0.997                | 0.999             |
| <i>TRPM3</i>         | 9   | 72,938,605  | 73,946,180  | rs7150714                          | 9:73,438,605  | 0.584 | $3.2 \times 10^{-9}$   | intronic      | 0.929                | 0.999             |
| <i>TGFBR1</i>        | 9   | 101,358,102 | 102,431,769 | rs1626340                          | 9:101,923,372 | 0.199 | $2.3 \times 10^{-11}$  | intergenic    | 1.000                | 0.999             |
| <i>ABCA1</i>         | 9   | 107,139,414 | 108,167,147 | rs2740488                          | 9:107,661,742 | 0.265 | $1.7 \times 10^{-9}$   | intronic      | 0.963                | 0.985             |
| <i>ARHGAP21</i>      | 10  | 24,360,361  | 25,556,538  | rs12357257                         | 10:24,999,593 | 0.232 | $4.3 \times 10^{-9}$   | intronic      | 0.962                | 0.986             |

| Known 34 Loci         |     |             |             | Top significant variant by P-value |                |       |                       |               | Bayesian Regional-PP | Fgwas Regional-PP |
|-----------------------|-----|-------------|-------------|------------------------------------|----------------|-------|-----------------------|---------------|----------------------|-------------------|
| Locus name            | Chr | Start       | End         | dbSNPID                            | Chr:Position   | MAF   | P-value               | Anno          |                      |                   |
| <i>ARMS2/HTRA1</i>    | 10  | 123,702,126 | 124,735,355 | rs3750846                          | 10:124,215,565 | 0.316 | $<9 \times 10^{-321}$ | intronic      | 1.000                | 1.000             |
| <i>RDH5/CD63</i>      | 12  | 55,615,585  | 56,713,297  | rs3138141                          | 12:56,115,778  | 0.214 | $4.7 \times 10^{-10}$ | intronic      | 0.034                | 0.999             |
| <i>ACAD10</i>         | 12  | 110,919,995 | 113,502,935 | rs73205633                         | 12:112,357,085 | 0.019 | $1.2 \times 10^{-10}$ | intergenic    | 0.997                | 0.999             |
| <i>B3GALTL</i>        | 13  | 31,242,232  | 32,339,274  | rs9564692                          | 13:31,821,240  | 0.288 | $3.2 \times 10^{-11}$ | splice        | 1.000                | 0.999             |
| <i>RAD51B</i>         | 14  | 68,227,506  | 69,550,783  | rs1956526                          | 14:68,799,787  | 0.650 | $1.0 \times 10^{-11}$ | intronic      | 1.000                | 0.999             |
| <i>LIPC</i>           | 15  | 58,171,721  | 59,242,418  | rs2414577                          | 15:58,680,638  | 0.365 | $4.8 \times 10^{-17}$ | nc-transcript | 1.000                | 1.000             |
| <i>CETP</i>           | 16  | 56,485,514  | 57,506,829  | rs5817082                          | 16:56,997,349  | 0.248 | $1.7 \times 10^{-21}$ | intronic      | 1.000                | 1.000             |
| <i>CTRB2/CTRB1</i>    | 16  | 74,732,528  | 76,017,115  | rs72802342                         | 16:75,234,872  | 0.073 | $2.8 \times 10^{-13}$ | downstream    | 1.000                | 1.000             |
| <i>TMEM97/VTN</i>     | 17  | 26,092,946  | 27,240,139  | rs11080055                         | 17:26,649,724  | 0.524 | $1.5 \times 10^{-9}$  | intronic      | 0.996                | 0.998             |
| <i>NPLOC4/TSPAN10</i> | 17  | 79,015,509  | 80,186,552  | rs6565597                          | 17:79,526,821  | 0.390 | $1.0 \times 10^{-12}$ | intronic      | 1.000                | 0.999             |
| <i>C3</i>             | 19  | 5,311,717   | 7,224,340   | rs2230199                          | 19:6,718,387   | 0.764 | $1.7 \times 10^{-77}$ | missense      | 1.000                | 1.000             |
| <i>CNN2</i>           | 19  | 523,867     | 1,533,360   | rs10422209                         | 19:1,026,318   | 0.132 | $5.5 \times 10^{-9}$  | upstream      | 0.970                | 0.993             |
| <i>APOE</i>           | 19  | 44,892,254  | 46,313,830  | rs429358                           | 19:45,411,941  | 0.118 | $3.3 \times 10^{-46}$ | missense      | 1.000                | 1.000             |
| <i>MMP9</i>           | 20  | 44,114,991  | 45,160,699  | rs142450006                        | 20:44,614,991  | 0.132 | $1.4 \times 10^{-11}$ | intergenic    | 1.000                | 0.999             |
| <i>C20orf85</i>       | 20  | 56,084,276  | 57,174,034  | rs117739907                        | 20:56,652,781  | 0.062 | $7.8 \times 10^{-18}$ | intergenic    | 1.000                | 1.000             |
| <i>SYN3/TIMP3</i>     | 22  | 32,546,536  | 33,613,375  | rs5754227                          | 22:33,105,817  | 0.123 | $2.0 \times 10^{-27}$ | intronic      | 1.000                | 1.000             |
| <i>SLC16A8</i>        | 22  | 37,795,271  | 39,003,972  | rs8135665                          | 22:38,476,276  | 0.205 | $2.9 \times 10^{-12}$ | intronic      | 1.000                | 0.999             |

**Supplementary Table 3: AMD risk variants by SFBA in the known 34 loci, accounting for gene-based functional annotations.** Variants with Bayesian PPs >0.5 or the highest Bayesian PPs in the loci are listed. Shown are reside/nearby genes, dbSNPIDs, positions, functional annotations, MAFs (unfolded, corresponding to the direction of effect-sizes), P-values, and Bayesian PPs/effect-sizes.

| Signal number | Reside/Nearby Gene  | dbSNPID     | Chr:Position   | Anno          | MAF   | Bayesian PP | Effect-size | P-value                  |
|---------------|---------------------|-------------|----------------|---------------|-------|-------------|-------------|--------------------------|
| 1.1           | <i>CFH</i>          | rs800292    | 1:196,642,233  | missense      | 0.183 | 0.997       | -0.312      | $2.4 \times 10^{-319}$   |
| 1.2           | <i>CFH</i>          | rs10922094  | 1:196,661,505  | intronic      | 0.530 | 1.000       | -0.214      | $< 9.0 \times 10^{-321}$ |
| 1.3           | <i>CFHR1</i>        | rs605082    | 1:196,801,917  | downstream    | 0.353 | 0.518       | -0.092      | $7.5 \times 10^{-257}$   |
| 1.4           | <i>CFHR4</i>        | rs58175074  | 1:196,820,080  | intronic      | 0.158 | 0.792       | -0.314      | $< 9.0 \times 10^{-321}$ |
| 1.5           | <i>CFHR4</i>        | rs149032610 | 1:196,857,150  | 5'-UTR        | 0.015 | 1.000       | 0.195       | $6.6 \times 10^{-38}$    |
| 1.6           | <i>CFHR4</i>        | rs10494745  | 1:196,887,457  | missense      | 0.134 | 0.526       | 0.092       | $7.4 \times 10^{-137}$   |
| 1.7           | <i>CFHR2</i>        | rs138579109 | 1:196,923,955  | intronic      | 0.043 | 0.893       | 0.167       | $8.4 \times 10^{-85}$    |
| 1.8           | <i>CFHR5</i>        | rs35662416  | 1:196,967,354  | missense      | 0.022 | 0.889       | -0.122      | $5.8 \times 10^{-6}$     |
| 2             | <i>COL4A3</i>       | rs11884770  | 2:228,086,920  | intronic      | 0.731 | 0.269       | 0.052       | $5.6 \times 10^{-9}$     |
| 3             | <i>ADAMTS9-AS2</i>  | rs7428936   | 3:64,710,850   | intronic      | 0.448 | 0.167       | -0.061      | $1.5 \times 10^{-15}$    |
| 4             | <i>COL8A1</i>       | rs140647181 | 3:99,180,668   | intergenic    | 0.019 | 0.687       | 0.224       | $54 \times 10^{-13}$     |
| 5             | <i>CFI</i>          | rs10033900  | 4:110,659,067  | downstream    | 0.506 | 0.999       | -0.067      | $7.2 \times 10^{-19}$    |
| 6             | <i>C9</i>           | rs34882957  | 5:39,331,894   | missense      | 0.012 | 0.998       | 0.278       | $4.0 \times 10^{-16}$    |
| 7             | <i>PRLR/SPEF2</i>   | rs114092250 | 5:35,494,448   | intergenic    | 0.019 | 0.403       | -0.174      | $2.5 \times 10^{-9}$     |
| 8.1           | <i>C2/CFB</i>       | rs4151667   | 6:31,914,024   | missense      | 0.036 | 0.917       | -0.279      | $1.4 \times 10^{-44}$    |
| 8.2           | <i>SKIV2L/NELFE</i> | rs115270436 | 6:31,928,306   | missense      | 0.071 | 0.633       | -0.321      | $2.8 \times 10^{-99}$    |
| 8.3           | <i>HLA-DQB1</i>     | rs3891176   | 6:32,634,318   | missense      | 0.159 | 0.726       | 0.153       | $1.2 \times 10^{-11}$    |
| 9             | <i>VEGFA</i>        | rs943080    | 6:43,826,627   | intergenic    | 0.518 | 0.435       | 0.063       | $2.0 \times 10^{-16}$    |
| 10            | <i>KMT2E/SRPK2</i>  | rs1142      | 7:104,756,326  | downstream    | 0.357 | 0.125       | 0.052       | $1.5 \times 10^{-10}$    |
| 11            | <i>PILRB</i>        | rs35986051  | 7:99,956,439   | missense      | 0.139 | 0.193       | 0.075       | $4.0 \times 10^{-10}$    |
| 12            | <i>TNFRSF10A</i>    | rs79037040  | 8:23,082,971   | nc-transcript | 0.534 | 0.996       | 0.053       | $2.9 \times 10^{-12}$    |
| 13            | <i>MIR6130/RORB</i> | rs10781182  | 9:76,617,720   | intergenic    | 0.684 | 0.070       | -0.052      | $3.0 \times 10^{-10}$    |
| 14            | <i>TRPM3</i>        | rs71507014  | 9:73,438,605   | intronic      | 0.584 | 0.822       | -0.046      | $3.2 \times 10^{-9}$     |
| 15            | <i>TGFBR1</i>       | rs10819635  | 9:101,864,510  | upstream      | 0.186 | 0.137       | -0.066      | $2.4 \times 10^{-11}$    |
| 16            | <i>ABCA1</i>        | rs2740488   | 9:107,661,742  | intronic      | 0.266 | 0.756       | -0.053      | $1.7 \times 10^{-9}$     |
| 17            | <i>ARHGAP21</i>     | rs12357257  | 10:24,999,593  | intronic      | 0.232 | 0.318       | 0.053       | $4.3 \times 10^{-9}$     |
| 18            | <i>ARMS2</i>        | rs10490924  | 10:124,214,448 | missense      | 0.316 | 0.996       | 0.474       | $< 9.0 \times 10^{-321}$ |
| 19            | <i>RDH5/CD63</i>    | rs3138142   | 12:56,115,585  | coding-syn    | 0.213 | 0.706       | 0.074       | $6.1 \times 10^{-10}$    |
| 20            | <i>MAPKAPK5</i>     | rs61941287  | 12:112,330,305 | intronic      | 0.019 | 0.309       | 0.191       | $1.2 \times 10^{-10}$    |
| 21            | <i>B3GLCT</i>       | rs9564692   | 13:31,821,240  | splice        | 0.288 | 0.942       | -0.056      | $3.2 \times 10^{-11}$    |
| 22            | <i>RAD51B</i>       | rs2842339   | 14:68,986,999  | intronic      | 0.899 | 0.243       | -0.082      | $3.1 \times 10^{-7}$     |
| 23            | <i>ALDH1A2</i>      | rs2414577   | 15:58,680,638  | intronic      | 0.366 | 0.501       | -0.067      | $4.8 \times 10^{-17}$    |

| Signal number | Reside/Nearby Gene             | dbSNPID     | Chr:Position  | Anno       | MAF   | Bayesian PP | Effect-size | P-value               |
|---------------|--------------------------------|-------------|---------------|------------|-------|-------------|-------------|-----------------------|
| 24            | <i>CETP</i>                    | rs1532625   | 16:57,005,301 | splice     | 0.448 | 0.358       | 0.044       | $7.9 \times 10^{-19}$ |
| 25            | <i>CTRB2</i>                   | rs72802342  | 16:75,234,872 | downstream | 0.360 | 0.297       | -0.114      | $2.8 \times 10^{-13}$ |
| 26            | <i>CTB-96E2.2/VTN</i>          | rs704       | 17:26,694,861 | missense   | 0.483 | 0.325       | 0.042       | $3.3 \times 10^{-8}$  |
| 27            | <i>NPLOC4/TSPAN10</i>          | rs6420484   | 17:79,612,397 | missense   | 0.622 | 0.402       | -0.055      | $4.0 \times 10^{-12}$ |
| 28.1          | <i>FUT6/NRTN</i>               | rs17855739  | 19:5,831,840  | missense   | 0.044 | 0.681       | -0.159      | $1.5 \times 10^{-16}$ |
| 28.2          | <i>C3/CTD-3128G10.7</i>        | rs147859257 | 19:6,718,146  | missense   | 0.008 | 1.000       | 0.501       | $4.3 \times 10^{-31}$ |
| 28.3          | <i>C3/CTD-3128G10.7</i>        | rs2230199   | 19:6,718,387  | missense   | 0.764 | 1.000       | -0.172      | $1.7 \times 10^{-77}$ |
| 29.1          | <i>ABCA7</i>                   | rs3752237   | 19:1,047,161  | coding-syn | 0.644 | 0.544       | -0.065      | $6.7 \times 10^{-3}$  |
| 29.2          | <i>ABCA7</i>                   | rs12151021  | 19:1,050,874  | intronic   | 0.708 | 1.000       | 0.091       | $1.9 \times 10^{-5}$  |
| 30            | <i>APOE/TOMM40/CTB-129P6.7</i> | rs429358    | 19:45,411,941 | missense   | 0.118 | 1.000       | -0.173      | $3.3 \times 10^{-46}$ |
| 31            | <i>MMP9/RP11-465L10.10</i>     | rs2274755   | 20:44,639,692 | splice     | 0.138 | 0.435       | -0.073      | $5.4 \times 10^{-11}$ |
| 32            | <i>C20orf85</i>                | rs201459901 | 20:56,653,724 | intergenic | 0.063 | 0.078       | -0.135      | $7.9 \times 10^{-18}$ |
| 33            | <i>SYN3</i>                    | rs5754227   | 22:33,105,817 | intronic   | 0.124 | 0.764       | -0.128      | $2.0 \times 10^{-27}$ |
| 34.1          | <i>SLC16A8/BAIAP2L2</i>        | rs4289289   | 22:38,477,342 | missense   | 0.485 | 0.824       | 0.056       | $1.1 \times 10^{-09}$ |
| 34.2          | <i>SLC16A8/BAIAP2L2</i>        | rs77968014  | 22:38,478,666 | splice     | 0.009 | 0.973       | 0.212       | $3.1 \times 10^{-6}$  |



**Supplementary Table 4: AMD risk variants by Fgwas in the known 34 loci, accounting for gene-based functional annotations.** Variants with Fgwas PPs >0.5 or the highest Fgwas PPs in the loci are listed in this table. Shown are reside/nearby genes, dbSNPIDs, positions, functional annotations, MAFs (unfolded), Fgwas PPs, and P-values.

| Signal number | Reside/Nearby Gene     | dbSNPID     | Chr:Position   | Anno          | MAF   | Fgwas PP | P-value                  |
|---------------|------------------------|-------------|----------------|---------------|-------|----------|--------------------------|
| 1.1           | <i>CFH</i>             | rs77498516  | 1:196,115,300  | intergenic    | 0.048 | 0.522    | $8.2 \times 10^{-27}$    |
| 1.2           | <i>CFH</i>             | rs10922109  | 1:196,704,632  | intronic      | 0.329 | 0.802    | $< 9.0 \times 10^{-321}$ |
| 1.3           | <i>RP4-608O15.3</i>    | rs521631    | 1:196,813,352  | intronic      | 0.506 | 0.999    | $< 9.0 \times 10^{-321}$ |
| 2             | <i>COL4A3</i>          | rs11884770  | 2:228,086,920  | intronic      | 0.731 | 0.181    | $5.7 \times 10^{-9}$     |
| 3             | <i>ADAMTS9-AS2</i>     | rs62247658  | 3:64,715,155   | intronic      | 0.551 | 0.167    | $1.5 \times 10^{-15}$    |
| 4             | <i>COL8A1</i>          | rs140647181 | 3:99,180,668   | intergenic    | 0.019 | 0.999    | $5.4 \times 10^{-13}$    |
| 5             | <i>CFI</i>             | rs10033900  | 4:110,659,067  | downstream    | 0.506 | 0.996    | $7.2 \times 10^{-19}$    |
| 6.1           | <i>C9</i>              | rs34882957  | 5:39,331,894   | missense      | 0.012 | 0.900    | $4.0 \times 10^{-16}$    |
| 6.2           | <i>FYB</i>             | rs62358735  | 5:39,199,134   | intronic      | 0.009 | 0.999    | $5.1 \times 10^{-13}$    |
| 7             | <i>PRLR/SPEF2</i>      | rs114092250 | 5:35,494,448   | intergenic    | 0.019 | 0.626    | $2.5 \times 10^{-9}$     |
| 8.1           | <i>HCG20/LINC00243</i> | rs114126524 | 6:30,763,893   | downstream    | 0.171 | 0.696    | $6.5 \times 10^{-12}$    |
| 8.2           | <i>HCG22</i>           | rs140895602 | 6:31,024,244   | nc-transcript | 0.021 | 0.925    | $1.2 \times 10^{-12}$    |
| 8.3           | <i>HLA-B</i>           | rs709055    | 6:31,324,151   | missense      | 0.440 | 0.999    | $1.9 \times 10^{-16}$    |
| 8.4           | <i>HCP5</i>            | rs116319118 | 6:31,440,641   | nc-transcript | 0.017 | 0.522    | $5.3 \times 10^{-14}$    |
| 8.5           | <i>HSPA1L/HSPA1A</i>   | rs62395827  | 6:31,786,730   | upstream      | 0.073 | 0.999    | $1.6 \times 10^{-46}$    |
| 8.6           | <i>NELFE/SKIV2L</i>    | rs116503776 | 6:31,930,462   | intronic      | 0.120 | 0.912    | $2.1 \times 10^{-114}$   |
| 8.7           | <i>MTCO3P1</i>         | rs114264172 | 6:32,672,214   | downstream    | 0.051 | 0.997    | $2.1 \times 10^{-14}$    |
| 8.8           | <i>BRD2</i>            | rs200978040 | 6:32,945,701   | missense      | 0.036 | 0.638    | $7.9 \times 10^{-8}$     |
| 8.9           | <i>COL11A2</i>         | rs114393147 | 6:33,125,742   | downstream    | 0.041 | 0.887    | $2.1 \times 10^{-10}$    |
| 9             | <i>VEGFA</i>           | rs943080    | 6:43,826,627   | intergenic    | 0.518 | 0.437    | $2.0 \times 10^{-16}$    |
| 10            | <i>KMT2E/SRPK2</i>     | rs1142      | 7:104,756,326  | downstream    | 0.357 | 0.182    | $1.5 \times 10^{-10}$    |
| 11            | <i>ZKSCAN1</i>         | rs72615157  | 7:99,635,967   | 3'-UTR        | 0.178 | 0.486    | $4.7 \times 10^{-8}$     |
| 12            | <i>TNFRSF10A</i>       | rs79037040  | 8:23,082,971   | nc-transcript | 0.534 | 0.996    | $2.9 \times 10^{-12}$    |
| 13            | <i>MIR6130/RORB</i>    | rs10781180  | 9:76,615,662   | intergenic    | 0.683 | 0.068    | $3.0 \times 10^{-10}$    |
| 14            | <i>TRPM3</i>           | rs71507014  | 9:73,438,605   | intronic      | 0.584 | 0.860    | $3.2 \times 10^{-9}$     |
| 15            | <i>TGFBR1</i>          | rs10819635  | 9:101,864,510  | upstream      | 0.186 | 0.188    | $2.4 \times 10^{-11}$    |
| 16            | <i>ABCA1</i>           | rs2740488   | 9:107,661,742  | intronic      | 0.266 | 0.760    | $1.7 \times 10^{-9}$     |
| 17            | <i>ARHGAP21</i>        | rs12357257  | 10:24,999,593  | intronic      | 0.232 | 0.280    | $4.3 \times 10^{-9}$     |
| 18            | <i>ARMS2/HTRA1</i>     | rs3793917   | 10:124,219,275 | upstream      | 0.316 | 1.000    | $< 9.0 \times 10^{-321}$ |
| 19            | <i>RDH5/CD63</i>       | rs3138142   | 12:56,115,585  | coding-syn    | 0.213 | 0.847    | $6.1 \times 10^{-10}$    |

|      |                        |             |                |            |       |       |                       |
|------|------------------------|-------------|----------------|------------|-------|-------|-----------------------|
| 20   | <i>MAPKAPK5</i>        | rs61941287  | 12:112,330,305 | intronic   | 0.019 | 0.503 | $1.2 \times 10^{-10}$ |
| 21   | <i>B3GALTL</i>         | rs9564692   | 13:31,821,240  | splice     | 0.288 | 0.889 | $3.2 \times 10^{-11}$ |
| 22   | <i>RAD51B</i>          | rs1956526   | 14:68,799,787  | intronic   | 0.650 | 0.039 | $1.0 \times 10^{-11}$ |
| 23   | <i>ALDH1A2</i>         | rs2414577   | 15:58,680,638  | intronic   | 0.366 | 0.495 | $4.8 \times 10^{-17}$ |
| 24   | <i>CETP</i>            | rs5817082   | 16:56,997,349  | intronic   | 0.248 | 0.193 | $1.7 \times 10^{-21}$ |
| 25   | <i>BCAR1</i>           | rs72802395  | 16:75,286,484  | intronic   | 0.068 | 0.605 | $2.1 \times 10^{-11}$ |
| 26   | <i>POLDIP2/TNFAIP1</i> | rs13469     | 17:26,676,135  | coding-syn | 0.523 | 0.168 | $5.1 \times 10^{-9}$  |
| 27   | <i>NPLOC4/TSPAN10</i>  | rs6420484   | 17:79,612,397  | missense   | 0.622 | 0.351 | $4.0 \times 10^{-12}$ |
| 28.1 | <i>FUT6</i>            | rs17855739  | 19:5,831,840   | missense   | 0.044 | 0.568 | $1.5 \times 10^{-16}$ |
| 28.2 | <i>C3</i>              | rs2230199   | 19:6,718,387   | missense   | 0.764 | 0.999 | $1.7 \times 10^{-77}$ |
| 29   | <i>CNN2</i>            | rs10422209  | 19:1,026,318   | upstream   | 0.132 | 0.229 | $5.2 \times 10^{-9}$  |
| 30   | <i>APOE/TOMM40</i>     | rs429358    | 19:45,411,941  | missense   | 0.118 | 1.000 | $3.3 \times 10^{-46}$ |
| 31   | <i>MMP9</i>            | rs2274755   | 20:44,639,692  | splice     | 0.138 | 0.194 | $5.4 \times 10^{-11}$ |
| 32   | <i>C20orf85</i>        | rs117739907 | 20:56,652,781  | intergenic | 0.063 | 0.079 | $7.8 \times 10^{-18}$ |
| 33   | <i>SYN3</i>            | rs5754227   | 22:33,105,817  | intronic   | 0.124 | 0.781 | $2.0 \times 10^{-27}$ |
| 34   | <i>SLC16A8/PICK1</i>   | rs8135665   | 22:38,476,276  | intronic   | 0.205 | 0.596 | $2.9 \times 10^{-12}$ |

**Supplementary Table 5: Novel AMD loci (with Bayesian regional-PP >0.95) identified by SFBA, accounting for gene-based functional annotations.** Variants with the highest Bayesian single variant PP in the novel loci are listed in this table. Shown are reside genes, dbSNPIDs, positions, functional annotations, MAFs, P-values, Bayesian regional-PPs, and Bayesian PPs/effect-sizes.

| Locus | Reside gene      | dbSNPID            | Chr:Position   | Anno       | MAF   | P-value              | Regional-PP | Bayesian PP | Effect-size |
|-------|------------------|--------------------|----------------|------------|-------|----------------------|-------------|-------------|-------------|
| 1     | <i>PPIL3</i>     | <i>rs7562391</i>   | 2:201,736,166  | missense   | 0.127 | $4.8 \times 10^{-7}$ | 0.989       | 0.666       | -0.061      |
| 2     | <i>ZNRD1-AS1</i> | <i>rs114318558</i> | 6:29,966,787   | downstream | 0.175 | $2.3 \times 10^{-7}$ | 0.993       | 0.135       | 0.058       |
| 3     | <i>CPN1</i>      | <i>rs61751507</i>  | 10:101,829,514 | missense   | 0.043 | $6.7 \times 10^{-8}$ | 0.994       | 0.598       | -0.106      |
| 4     | <i>ABHD2</i>     | <i>rs6496562</i>   | 15:89,736,558  | splice     | 0.417 | $8.4 \times 10^{-8}$ | 0.974       | 0.517       | 0.042       |
| 5     | <i>LBP</i>       | <i>rs2232613</i>   | 20:36,997,655  | missense   | 0.073 | $4.3 \times 10^{-7}$ | 0.955       | 0.881       | -0.079      |

**Supplementary Table 6: Novel AMD loci (with Fgwas regional-PP >0.95) identified by Fgwas (Supplementary Table 4), accounting for gene-based functional annotations.** Variants with the highest Fgwas single variant PP in the novel loci are listed in this table. Shown are reside genes, dbSNPIDs, positions, functional annotations, MAFs, P-values, Fgwas regional-PPs, Fgwas PPs, and Bayesian effect-sizes.

| Locus | Reside gene       | dbSNPID            | Chr:Position   | Anno          | MAF   | P-value              | Regional-PP | Fgwas PP | Effect-size |
|-------|-------------------|--------------------|----------------|---------------|-------|----------------------|-------------|----------|-------------|
| 1     | <i>PPIL3</i>      | <i>rs7562391</i>   | 2:201,736,166  | missense      | 0.127 | $4.8 \times 10^{-7}$ | 0.981       | 0.322    | -0.061      |
| 2     | <i>SERPINE2</i>   | <i>rs114750941</i> | 2:224,875,718  | intronic      | 0.025 | $3.2 \times 10^{-5}$ | 0.960       | 0.001    | 0.125       |
| 3     | <i>Intergenic</i> | <i>rs4674883</i>   | 2:225,184,903  | intergenic    | 0.573 | $1.2 \times 10^{-7}$ | 0.960       | 0.141    | 0.043       |
| 4     | <i>ABI3BP</i>     | <i>rs182405490</i> | 3:100,545,967  | nc-transcript | 0.007 | $3.3 \times 10^{-5}$ | 0.999       | 0.001    | 0.247       |
| 5     | <i>RPL34-AS1</i>  | <i>rs185276593</i> | 4:109,513,080  | nc-transcript | 0.116 | $1.6 \times 10^{-4}$ | 0.989       | 0.001    | -0.056      |
| 6     | <i>ZNRD1-AS1</i>  | <i>rs116112857</i> | 6:29,951,011   | downstream    | 0.027 | $1.2 \times 10^{-8}$ | 0.999       | 0.753    | -0.141      |
| 7     | <i>PACSN1</i>     | <i>rs41312309</i>  | 6:34,498,328   | missense      | 0.085 | $2.4 \times 10^{-5}$ | 0.997       | 0.017    | -0.057      |
| 8     | <i>CPN1</i>       | <i>rs61733667</i>  | 10:101,802,262 | coding-syn    | 0.036 | $1.0 \times 10^{-7}$ | 0.996       | 0.253    | -0.118      |
| 9     | <i>Intergenic</i> | <i>rs7922823</i>   | 10:125,058,372 | intergenic    | 0.991 | $9.4 \times 10^{-6}$ | 0.969       | 0.001    | -0.210      |
| 10    | <i>ABHD2</i>      | <i>rs6496562</i>   | 15:89,736,558  | splice        | 0.417 | $8.4 \times 10^{-8}$ | 0.978       | 0.252    | 0.042       |
| 11    | <i>SEMA4B</i>     | <i>rs908044</i>    | 15:90,768,959  | missense      | 0.417 | $1.0 \times 10^{-4}$ | 0.978       | 0.001    | 0.032       |
| 12    | <i>LBP</i>        | <i>rs2232613</i>   | 20:36,997,655  | missense      | 0.073 | $4.3 \times 10^{-7}$ | 0.959       | 0.647    | -0.079      |

**Supplementary Table 7: AMD risk variants by SFBA in the known 34 loci, accounting for summarized regulatory annotations.** Variants with Bayesian PPs >0.5 or the highest Bayesian PPs in the loci are listed (horizontal lines separate loci). Shown are reside/nearby genes, dbSNPIDs, positions, functional annotations, MAFs (unfolded, corresponding to the direction of effect-sizes), Bayesian PPs/effect-sizes, and P-values.

| Signal number | Reside/nearby gene         | dbSNPID     | Chr:Position   | Anno       | MAF   | Bayesian PP | Effect-size | P-value                  |
|---------------|----------------------------|-------------|----------------|------------|-------|-------------|-------------|--------------------------|
| 1.1           | <i>KCNT2</i>               | rs144520124 | 1:196,371,908  | DHS        | 0.005 | 1.000       | -0.383      | $1.9 \times 10^{-23}$    |
| 1.2           | <i>CFH</i>                 | rs74979069  | 1:196,588,463  | intergenic | 0.049 | 1.000       | 0.181       | $8.1 \times 10^{-92}$    |
| 1.3           | <i>CFH</i>                 | rs1089033   | 1:196,666,793  | intronic   | 0.412 | 1.000       | -0.117      | $< 9.0 \times 10^{-321}$ |
| 1.4           | <i>CFH</i>                 | rs2133143   | 1:196,718,099  | intergenic | 0.165 | 0.736       | -0.358      | $5.7 \times 10^{-246}$   |
| 1.5           | <i>CFH</i>                 | esv2672010  | 1:196,733,401  | others     | 0.157 | 1.000       | -0.283      | $3.3 \times 10^{-314}$   |
| 1.6           | <i>CFHR3</i>               | rs188826801 | 1:196,762,123  | intronic   | 0.014 | 0.993       | 0.176       | $1.2 \times 10^{-39}$    |
| 1.7           | <i>CFH</i>                 | rs79251424  | 1:196,782,416  | intergenic | 0.030 | 0.998       | 0.144       | $2.1 \times 10^{-6}$     |
| 1.8           | <i>RP4-608O15.3</i>        | rs146093852 | 1:196,811,860  | intergenic | 0.277 | 0.994       | -0.143      | $5.7 \times 10^{-254}$   |
| 2             | <i>COL4A3</i>              | rs11884770  | 2:228,086,920  | intronic   | 0.731 | 0.213       | 0.050       | $5.6 \times 10^{-9}$     |
| 3             | <i>ADAMTS9-AS2</i>         | rs11914351  | 3:64,723,441   | intronic   | 0.240 | 0.950       | -0.064      | $8.7 \times 10^{-7}$     |
| 4             | <i>COL8A1</i>              | rs140647181 | 3:99,180,668   | intergenic | 0.019 | 0.575       | 0.221       | $5.4 \times 10^{-13}$    |
| 5             | <i>CFI</i>                 | rs10033900  | 4:110,659,067  | intergenic | 0.506 | 0.994       | -0.067      | $7.2 \times 10^{-19}$    |
| 6             | <i>C9</i>                  | rs34882957  | 5:39,331,894   | coding     | 0.012 | 0.982       | 0.278       | $4.0 \times 10^{-9}$     |
| 7             | <i>PRLR/SPEF2</i>          | rs114092250 | 5:35,494,448   | intergenic | 0.019 | 0.346       | -0.172      | $2.5 \times 10^{-9}$     |
| 8.1           | <i>C2/CFB</i>              | rs4151667   | 6:31,914,024   | coding     | 0.035 | 0.579       | -0.284      | $1.3 \times 10^{-44}$    |
| 8.2           | <i>SKIV2/NELFE</i>         | rs115270436 | 6:31,928,306   | coding     | 0.071 | 0.566       | -0.321      | $2.8 \times 10^{-99}$    |
| 9             | <i>VEGFA</i>               | rs943080    | 6:43,826,627   | DHS        | 0.518 | 0.678       | 0.063       | $2.0 \times 10^{-16}$    |
| 10            | <i>LINC01004/KMT2E-AS1</i> | rs6950894   | 7:104,652,671  | promoter   | 0.511 | 0.063       | -0.047      | $9.8 \times 10^{-10}$    |
| 11            | <i>PILRB</i>               | rs7783159   | 7:100,017,454  | coding     | 0.203 | 0.115       | 0.059       | $5.1 \times 10^{-10}$    |
| 12            | <i>TNFRSF10A</i>           | rs79037040  | 8:23,082,971   | DHS        | 0.534 | 0.995       | 0.053       | $2.9 \times 10^{-12}$    |
| 13            | <i>MIR6130/RORB</i>        | rs10781180  | 9:76,615,662   | intergenic | 0.684 | 0.070       | -0.052      | $3.0 \times 10^{-10}$    |
| 14            | <i>TRPM3</i>               | rs71507014  | 9:73,438,605   | intronic   | 0.584 | 0.763       | -0.046      | $3.2 \times 10^{-9}$     |
| 15            | <i>TGFBR1</i>              | rs401186    | 9:101,925,077  | promoter   | 0.200 | 0.109       | -0.063      | $2.5 \times 10^{-11}$    |
| 16            | <i>ABCA1</i>               | rs2740488   | 9:107,661,742  | intronic   | 0.266 | 0.727       | -0.053      | $1.7 \times 10^{-9}$     |
| 17            | <i>ARHGAP21</i>            | rs12357257  | 10:24,999,593  | intronic   | 0.232 | 0.297       | 0.053       | $4.3 \times 10^{-9}$     |
| 18.1          | <i>ARMS2</i>               | rs7068411   | 10:124,202,878 | intergenic | 0.621 | 1.000       | 0.252       | $2.4 \times 10^{-212}$   |
| 18.2          | <i>ARMS2</i>               | rs7898343   | 10:124,212,887 | promoter   | 0.083 | 0.868       | -0.311      | $2.0 \times 10^{-51}$    |
| 18.3          | <i>ARMS2</i>               | rs10490923  | 10:124,214,251 | coding     | 0.109 | 0.962       | -0.272      | $1.7 \times 10^{-53}$    |
| 18.4          | <i>ARMS2</i>               | rs2736911   | 10:124,214,355 | coding     | 0.137 | 0.781       | -0.350      | $1.8 \times 10^{-53}$    |
| 18.5          | <i>HTRA1</i>               | rs2672601   | 10:124,220,023 | promoter   | 0.136 | 0.524       | -0.321      | $4.8 \times 10^{-53}$    |
| 18.6          | <i>HTRA1</i>               | rs74895474  | 10:124,230,397 | intronic   | 0.094 | 1.000       | -0.199      | $1.3 \times 10^{-42}$    |

| Signal number | Reside/nearby gene         | dbSNPID     | Chr:Position   | Anno     | MAF   | Bayesian PP | Effect-size | P-value                |
|---------------|----------------------------|-------------|----------------|----------|-------|-------------|-------------|------------------------|
| 18.7          | <i>HTRA1</i>               | rs12252027  | 10:124,234,988 | intronic | 0.099 | 1.000       | -0.189      | $1.4 \times 10^{-51}$  |
| 18.8          | <i>HTRA1</i>               | rs2672589   | 10:124,234988  | DHS      | 0.653 | 1.000       | 0.220       | $8.9 \times 10^{-180}$ |
| 19            | <i>RDH5/CD63</i>           | rs143673140 | 12:56,514,414  | coding   | 0.009 | 0.001       | -0.096      | $1.3 \times 10^{-2}$   |
| 20            | <i>MAPKAPK5</i>            | rs61941287  | 12:112,330,305 | intronic | 0.019 | 0.318       | 0.199       | $1.2 \times 10^{-10}$  |
| 21            | <i>B3GALT1</i>             | rs9564692   | 13:31,821,240  | DHS      | 0.288 | 0.429       | -0.056      | $3.2 \times 10^{-11}$  |
| 22            | <i>RAD51B</i>              | rs2842344   | 14:68,976,971  | DHS      | 0.899 | 0.215       | -0.082      | $3.7 \times 10^{-7}$   |
| 23            | <i>ALDH1A2</i>             | rs2414577   | 15:58,680,638  | DHS      | 0.366 | 0.508       | -0.067      | $1.5 \times 10^{-9}$   |
| 24            | <i>CETP</i>                | rs5883      | 16:57,007,353  | promoter | 0.060 | 0.415       | 0.085       | $1.4 \times 10^{-20}$  |
| 25            | <i>CTRB2</i>               | rs55993634  | 16:75,236,763  | promoter | 0.082 | 0.321       | -0.104      | $4.6 \times 10^{-5}$   |
| 26            | <i>POLDIP2/TNFAIP1</i>     | rs13469     | 17:26,676,135  | coding   | 0.524 | 0.280       | 0.044       | $5.2 \times 10^{-9}$   |
| 27            | <i>NPLOC4/TSPAN10</i>      | rs9894429   | 17:79,596,811  | coding   | 0.441 | 0.261       | -0.045      | $4.0 \times 10^{-12}$  |
| 28.1          | <i>FUT6/NRTN</i>           | rs17855739  | 19:5,831,840   | coding   | 0.044 | 0.549       | -0.159      | $1.5 \times 10^{-16}$  |
| 28.2          | <i>C3/CTD-3128G10.7</i>    | rs147859257 | 19:6,718,146   | coding   | 0.008 | 1.000       | 0.501       | $4.3 \times 10^{-31}$  |
| 28.3          | <i>C3/CTD-3128G10.7</i>    | rs2230199   | 19:6,718,387   | coding   | 0.764 | 0.999       | -0.173      | $1.7 \times 10^{-77}$  |
| 29            | <i>ABCA7</i>               | rs3752241   | 19:1,053,524   | coding   | 0.160 | 0.268       | 0.055       | $3.2 \times 10^{-7}$   |
| 30            | <i>APOE(EXOC3L2/MARK4)</i> | rs429358    | 19:45,411,941  | coding   | 0.118 | 1.000       | -0.173      | $3.3 \times 10^{-46}$  |
| 31            | <i>MMP9/RP11-465L10.10</i> | rs17577     | 20:44,643,111  | coding   | 0.138 | 0.377       | -0.072      | $6.8 \times 10^{-11}$  |
| 32            | <i>RP13-379L11.1</i>       | rs7266392   | 20:56,651,542  | DHS      | 0.063 | 0.115       | -0.134      | $9.2 \times 10^{-18}$  |
| 33            | <i>SYN3</i>                | rs5754227   | 22:33,105,817  | intronic | 0.124 | 0.524       | -0.129      | $2.0 \times 10^{-27}$  |
| 34            | <i>SLC16A8/BAIAP2L2</i>    | rs77968014  | 22:38,478,666  | coding   | 0.009 | 0.842       | 0.207       | $3.1 \times 10^{-6}$   |

**Supplementary Table 8: AMD risk variants by Fgwas method in the known 34 loci, accounting for summarized regulatory annotations.**

Variants with Fgwas PPs >0.5 or the highest Fgwas PPs in the loci or are listed (horizontal lines separate loci). Shown are reside/nearby genes, dbSNPIDs, positions, annotations, MAFs (unfolded, corresponding to the direction of effect-sizes), Fgwas PPs, and P-values.

| Signal number | Reside/nearby gene     | dbSNPID     | Chr:Position   | Anno       | MAF   | Fgwas PP | P-value                |
|---------------|------------------------|-------------|----------------|------------|-------|----------|------------------------|
| 1             | <i>Intergenic</i>      | rs77498516  | 1:196,115,300  | intergenic | 0.048 | 0.522    | $8.2 \times 10^{-27}$  |
| 2             | <i>COL4A3</i>          | rs11884770  | 2:228,086,920  | intronic   | 0.731 | 0.146    | $5.7 \times 10^{-9}$   |
| 3             | <i>Intergenic</i>      | rs61092465  | 3:65,149,489   | intergenic | 0.021 | 0.001    | $1.6 \times 10^{-3}$   |
| 4             | <i>Intergenic</i>      | rs140647181 | 3:99,180,668   | intergenic | 0.019 | 0.999    | $5.4 \times 10^{-13}$  |
| 5             | <i>CFI</i>             | rs10033900  | 4:110,659,067  | intergenic | 0.506 | 0.996    | $7.2 \times 10^{-19}$  |
| 6.1           | <i>C9</i>              | rs34882957  | 5:39,331,894   | coding     | 0.012 | 0.757    | $4.0 \times 10^{-16}$  |
| 6.2           | <i>FYB</i>             | rs62358735  | 5:39,199,134   | intronic   | 0.009 | 0.999    | $5.1 \times 10^{-13}$  |
| 7             | <i>Intergenic</i>      | rs114092250 | 5:35,494,448   | intergenic | 0.019 | 0.617    | $2.5 \times 10^{-9}$   |
| 8.1           | <i>HCG20/LINC00243</i> | rs114126524 | 6:30,763,893   | DHS        | 0.171 | 0.785    | $6.5 \times 10^{-12}$  |
| 8.2           | <i>HCG22</i>           | rs140895602 | 6:31,024,244   | intergenic | 0.021 | 0.553    | $1.2 \times 10^{-12}$  |
| 8.3           | <i>HSPA1A</i>          | rs62395827  | 6:31,786,730   | DHS        | 0.073 | 1.000    | $1.6 \times 10^{-46}$  |
| 8.4           | <i>NELFE/SKIV2L</i>    | rs116503776 | 6:31,930,462   | intronic   | 0.120 | 0.789    | $2.1 \times 10^{-114}$ |
| 8.5           | <i>MTCO3P1</i>         | rs114264172 | 6:32,672,214   | intergenic | 0.051 | 0.997    | $2.1 \times 10^{-14}$  |
| 8.6           | <i>BRD2</i>            | rs200978040 | 6:32,945,701   | coding     | 0.035 | 0.522    | $7.9 \times 10^{-8}$   |
| 8.7           | <i>COL11A2</i>         | rs114393147 | 6:33,125,742   | intergenic | 0.041 | 0.782    | $2.1 \times 10^{-10}$  |
| 9             | <i>Intergenic</i>      | rs943080    | 6:43,826,627   | DHS        | 0.518 | 0.557    | $2.0 \times 10^{-16}$  |
| 10            | <i>KMT2E/SRPK2</i>     | rs1142      | 7:104,756,326  | UTR        | 0.357 | 0.215    | $1.5 \times 10^{-10}$  |
| 11            | <i>ZKSCAN1</i>         | rs72615157  | 7:99,635,967   | UTR        | 0.177 | 0.561    | $4.7 \times 10^{-8}$   |
| 12            | <i>TNFRSF10A</i>       | rs79037040  | 8:23,082,971   | DHS        | 0.534 | 0.995    | $2.9 \times 10^{-12}$  |
| 13            | <i>Intergenic</i>      | rs10781180  | 9:76,615,662   | intergenic | 0.683 | 0.067    | $3.0 \times 10^{-10}$  |
| 14            | <i>TRPM3</i>           | rs71507014  | 9:73,438,605   | intronic   | 0.584 | 0.837    | $3.2 \times 10^{-9}$   |
| 15            | <i>TGFBR1</i>          | rs10760667  | 9:101,864,607  | DHS        | 0.105 | 0.186    | $2.5 \times 10^{-11}$  |
| 16            | <i>ABCA1</i>           | rs2740488   | 9:107,661,742  | intronic   | 0.266 | 0.667    | $1.7 \times 10^{-9}$   |
| 17            | <i>ARHGAP21</i>        | rs12357257  | 10:24,999,593  | intronic   | 0.232 | 0.227    | $4.3 \times 10^{-9}$   |
| 18            | <i>PSTK</i>            | rs140627984 | 10:124,723,092 | intergenic | 0.121 | 0.003    | $1.4 \times 10^{-6}$   |
| 19            | <i>OR6C4</i>           | rs7313899   | 12:55,945,119  | coding     | 0.985 | 0.001    | $3.0 \times 10^{-10}$  |
| 20            | <i>Intergenic</i>      | rs73205633  | 12:112,357,085 | intergenic | 0.019 | 0.495    | $1.2 \times 10^{-10}$  |
| 21            | <i>B3GALT1</i>         | rs9564692   | 13:31,821,240  | DHS        | 0.288 | 0.543    | $3.2 \times 10^{-11}$  |
| 22            | <i>RAD51B</i>          | rs11158728  | 14:68,762,205  | DHS        | 0.641 | 0.040    | $1.2 \times 10^{-11}$  |
| 23            | <i>ALDH1A2</i>         | rs2414577   | 15:58,680,638  | DHS        | 0.366 | 0.500    | $4.8 \times 10^{-17}$  |
| 24            | <i>CETP</i>            | rs5817082   | 16:56,997,349  | intronic   | 0.248 | 0.179    | $1.7 \times 10^{-21}$  |
| 25            | <i>BCAR1</i>           | rs72802395  | 16:75,286,484  | intronic   | 0.068 | 0.623    | $2.1 \times 10^{-11}$  |
| 26            | <i>POLDIP2/NFAIP1</i>  | rs13469     | 17:26,676,135  | coding     | 0.523 | 0.134    | $5.1 \times 10^{-12}$  |

|    |                      |             |               |          |       |       |                       |
|----|----------------------|-------------|---------------|----------|-------|-------|-----------------------|
| 27 | <i>NPLOC4</i>        | rs8070929   | 17:79,530,993 | intronic | 0.378 | 0.176 | $1.1 \times 10^{-12}$ |
| 28 | <i>C3</i>            | rs2230199   | 19:6,718,387  | coding   | 0.764 | 0.999 | $1.7 \times 10^{-77}$ |
| 29 | <i>CNN2/ABCA7</i>    | rs58369307  | 19:1,038,290  | UTR      | 0.109 | 0.207 | $8.5 \times 10^{-9}$  |
| 30 | <i>APOE/TOMM40</i>   | rs429358    | 19:45,411,941 | coding   | 0.118 | 1.000 | $3.3 \times 10^{-46}$ |
| 31 | <i>MMP9</i>          | rs17577     | 20:44,643,111 | coding   | 0.138 | 0.131 | $6.8 \times 10^{-11}$ |
| 32 | <i>RP13-379L11.1</i> | rs141945849 | 20:56,650,604 | DHS      | 0.063 | 0.092 | $9.3 \times 10^{-18}$ |
| 33 | <i>SYN3</i>          | rs5754227   | 22:33,105,817 | intronic | 0.124 | 0.681 | $2.0 \times 10^{-27}$ |
| 34 | <i>SLC16A8/PICK1</i> | rs8135665   | 22:38,476,276 | intronic | 0.205 | 0.607 | $2.9 \times 10^{-12}$ |

**Supplementary Table 9: Novel AMD loci (with Bayesian regional-PP >0.95) identified by SFBA, accounting for summarized regulatory annotations.** Variants with the highest Bayesian PP in the novel loci are listed in this table. Shown are reside genes, dbSNPIDs, positions, functional annotations, MAFs, P-values, Bayesian regional-PPs, and Bayesian PPs/effect-sizes.

| Locus | Reside gene      | dbSNPID     | Chr:Position   | Anno       | MAF   | P-value              | Regional-PP | Bayesian PP | Effect-size |
|-------|------------------|-------------|----------------|------------|-------|----------------------|-------------|-------------|-------------|
| 1     | <i>PPIL3</i>     | rs7562391   | 2:201,736,166  | coding     | 0.127 | $4.8 \times 10^{-7}$ | 0.967       | 0.475       | -0.061      |
| 2     | <i>ZNRD1-AS1</i> | rs114357644 | 6:29,924,728   | intergenic | 0.669 | $2.3 \times 10^{-7}$ | 0.999       | 0.609       | 0.051       |
| 3     | <i>CPN1</i>      | rs61733667  | 10:101,829,514 | coding     | 0.036 | $1.0 \times 10^{-7}$ | 0.994       | 0.463       | -0.118      |

**Supplementary Table 10: Novel AMD loci (with Bayesian regional-PP >0.95) identified by Fgwas, accounting for summarized regulatory annotations.** Variants with the highest Fgwas PP in the novel loci are listed in this table. Shown are reside genes, dbSNPIDs, positions, functional annotations, MAFs, P-values, Fgwas regional-PPs, Fgwas PPs, and Bayesian effect-sizes.

| Locus | Reside gene       | dbSNPID     | Chr:Position   | Anno       | MAF   | P-value              | Regional-PP | Fgwas PP | Effect-size |
|-------|-------------------|-------------|----------------|------------|-------|----------------------|-------------|----------|-------------|
| 1     | <i>PPIL3</i>      | rs7562391   | 2:201,736,166  | coding     | 0.127 | $4.8 \times 10^{-7}$ | 0.976       | 0.322    | -0.061      |
| 2     | <i>SERPINE2</i>   | rs7588220   | 2:224,873,604  | DHS        | 0.025 | $3.2 \times 10^{-5}$ | 0.966       | 0.001    | 0.129       |
| 3     | <i>Intergenic</i> | rs4674883   | 2:225,184,903  | intergenic | 0.573 | $1.2 \times 10^{-7}$ | 0.966       | 0.141    | 0.043       |
| 4     | <i>ABI3BP</i>     | rs182405490 | 3:100,545,967  | others     | 0.007 | $3.3 \times 10^{-5}$ | 0.999       | 0.001    | 0.247       |
| 5     | <i>RPL34-AS1</i>  | rs151204018 | 4:108,847,538  | others     | 0.007 | $4.8 \times 10^{-4}$ | 0.988       | 0.001    | 0.254       |
| 6     | <i>ZNRD1-AS1</i>  | rs75140056  | 6:29,608,184   | intergenic | 0.601 | $9.6 \times 10^{-9}$ | 0.999       | 0.261    | 0.045       |
| 7     | <i>PACSN1</i>     | rs41312309  | 6:34,498,328   | coding     | 0.085 | $2.4 \times 10^{-5}$ | 0.995       | 0.017    | -0.057      |
| 8     | <i>CPN1</i>       | rs61733667  | 10:101,802,262 | coding     | 0.036 | $1.0 \times 10^{-7}$ | 0.994       | 0.253    | -0.118      |
| 9     | <i>Intergenic</i> | rs7922823   | 10:125,058,372 | others     | 0.991 | $9.4 \times 10^{-6}$ | 0.961       | 0.001    | -0.210      |
| 10    | <i>ABHD2</i>      | rs8042649   | 15:89,740,469  | UTR        | 0.417 | $1.2 \times 10^{-7}$ | 0.973       | 0.093    | 0.049       |
| 11    | <i>SEMA4B</i>     | rs11547962  | 15:90,772,005  | UTR        | 0.399 | $4.3 \times 10^{-5}$ | 0.973       | 0.001    | 0.032       |

**Supplementary Table 11: AMD risk variants by SFBA in the known 34 loci, accounting for chromatin states profiled in the K562 cell type.**

Variants with Bayesian PPs >0.5 or the highest Bayesian PPs in the loci are listed in this table. Shown are reside/nearby genes, dbSNPIDs, positions, annotations, MAFs (unfolded, corresponding to the direction of effect-sizes), P-values, and Bayesian PPs/effect-sizes.

| Signal number | Reside/nearby gene     | dbSNPID            | Chr:Position   | Anno           | MAF   | Bayesian PP | Effect-size | P-value                |
|---------------|------------------------|--------------------|----------------|----------------|-------|-------------|-------------|------------------------|
| 1.1           | <i>KCNT2</i>           | <i>rs72732259</i>  | 1:196,464,113  | APromoter      | 0.266 | 0.915       | -0.064      | $4.2 \times 10^{-196}$ |
| 1.2           | <i>Intergenic</i>      | <i>rs74979069</i>  | 1:196,588,463  | CNV            | 0.049 | 1.000       | 0.160       | $8.1 \times 10^{-92}$  |
| 1.3           | <i>CFH</i>             | <i>rs72734340</i>  | 1:196,681,376  | CNV            | 0.037 | 1.000       | -0.189      | $1.1 \times 10^{-1}$   |
| 1.4           | <i>Intergenic</i>      | <i>rs200467660</i> | 1:196,721,770  | CNV            | 0.161 | 1.000       | -0.405      | $1.1 \times 10^{-249}$ |
| 1.5           | <i>Intergenic</i>      | <i>rs79654026</i>  | 1:196,725,939  | CNV            | 0.148 | 0.935       | -0.207      | $2.2 \times 10^{-310}$ |
| 1.6           | <i>ZNF675</i>          | <i>rs146093952</i> | 1:196,811,860  | CNV            | 0.277 | 1.000       | -0.207      | $2.2 \times 10^{-310}$ |
| 1.7           | <i>CFHR4</i>           | <i>rs71631868</i>  | 1:196,815,711  | CNV            | 0.149 | 1.000       | -0.172      | $1.3 \times 10^{-295}$ |
| 1.8           | <i>CFHR5</i>           | <i>rs139017763</i> | 1:196,965,193  | CNV            | 0.005 | 1.000       | -0.388      | $2.8 \times 10^{-25}$  |
| 2             | <i>COL4A3</i>          | <i>rs11884770</i>  | 2:228,086,920  | CNV            | 0.731 | 0.161       | 0.051       | $5.6 \times 10^{-9}$   |
| 3             | <i>ADAMTS9-AS2</i>     | <i>rs11914351</i>  | 3:64,723,441   | CNV            | 0.240 | 0.783       | -0.064      | $8.7 \times 10^{-7}$   |
| 4             | <i>Intergenic</i>      | <i>rs140647181</i> | 3:99,180,668   | CNV            | 0.019 | 0.679       | 0.222       | $5.3 \times 10^{-13}$  |
| 5             | <i>CFI</i>             | <i>rs10033900</i>  | 4:110,659,067  | WEnhancer      | 0.506 | 0.982       | -0.067      | $7.2 \times 10^{-19}$  |
| 6             | <i>C9</i>              | <i>rs62358361</i>  | 5:39,327,888   | CNV            | 0.012 | 0.376       | 0.271       | $3.1 \times 10^{-16}$  |
| 7             | <i>Intergenic</i>      | <i>rs114092250</i> | 5:35,494,448   | WEnhancer      | 0.019 | 0.659       | -0.171      | $2.5 \times 10^{-9}$   |
| 8.1           | <i>C6orf48</i>         | <i>rs200497397</i> | 6:31,810822    | WEnhancer      | 0.028 | 0.990       | 0.160       | $9.8 \times 10^{-15}$  |
| 8.2           | <i>PBX2/AGER/GPSM3</i> | <i>rs114254831</i> | 6:32,155,581   | SEnhancer      | 0.271 | 0.999       | 0.080       | $8.1 \times 10^{-13}$  |
| 9             | <i>Intergenic</i>      | <i>rs943080</i>    | 6:43,826,627   | CNV            | 0.518 | 0.397       | 0.063       | $2.0 \times 10^{-16}$  |
| 10            | <i>KMT2E/SRPK2</i>     | <i>rs1144</i>      | 7:104,756,355  | Txn_Elongation | 0.362 | 0.100       | 0.057       | $1.6 \times 10^{-10}$  |
| 11            | <i>TSC22D4</i>         | <i>rs11559117</i>  | 7:100,076,614  | APromoter      | 0.202 | 0.034       | 0.059       | $7.8 \times 10^{-10}$  |
| 12            | <i>TNFRSF10A</i>       | <i>rs79037040</i>  | 8:23,082,971   | APromoter      | 0.534 | 0.993       | 0.053       | $2.9 \times 10^{-12}$  |
| 13            | <i>Intergenic</i>      | <i>rs1078176</i>   | 9:76,592,874   | APromoter      | 0.684 | 0.229       | -0.052      | $3.0 \times 10^{-10}$  |
| 14            | <i>TRPM3</i>           | <i>rs71507014</i>  | 9:73,438,605   | CNV            | 0.585 | 0.734       | -0.046      | $3.2 \times 10^{-9}$   |
| 15            | <i>TGFBR1</i>          | <i>rs10819635</i>  | 9:10,819,635   | WEnhancer      | 0.186 | 0.117       | -0.066      | $2.5 \times 10^{-11}$  |
| 16            | <i>ABCA1</i>           | <i>rs2740488</i>   | 9:107,661,742  | CNV            | 0.266 | 0.736       | -0.053      | $1.7 \times 10^{-9}$   |
| 17            | <i>ARHGAP21</i>        | <i>rs12357257</i>  | 10:24,999,593  | Txn_Elongation | 0.232 | 0.274       | 0.053       | $4.3 \times 10^{-9}$   |
| 18.1          | <i>Intergenic</i>      | <i>rs7068411</i>   | 10:124,202,878 | CNV            | 0.621 | 1.000       | 0.198       | $2.4 \times 10^{-212}$ |
| 18.2          | <i>HTRA1</i>           | <i>rs2672595</i>   | 10:124,227,288 | CNV            | 0.213 | 0.844       | -0.466      | $8.7 \times 10^{-111}$ |
| 18.3          | <i>HTRA1</i>           | <i>rs4752699</i>   | 10:124,234,320 | CNV            | 0.128 | 1.000       | -0.292      | $2.1 \times 10^{-51}$  |
| 18.4          | <i>HTRA1</i>           | <i>rs2672589</i>   | 10:124,234,988 | CNV            | 0.653 | 1.000       | 0.274       | $8.9 \times 10^{-180}$ |
| 19            | <i>SARNP</i>           | <i>rs77232256</i>  | 12:56,170,342  | Txn_Elongation | 0.024 | 0.001       | 0.132       | $2.5 \times 10^{-4}$   |
| 20            | <i>NAA25</i>           | <i>rs56143183</i>  | 12:112,545,374 | APromoter      | 0.048 | 0.541       | 0.155       | $4.8 \times 10^{-9}$   |
| 21            | <i>B3GALT1</i>         | <i>rs9564692</i>   | 13:31,821,240  | CNV            | 0.288 | 0.379       | -0.056      | $3.2 \times 10^{-11}$  |



| Signal number | Reside/nearby gene            | dbSNPID            | Chr:Position  | Anno           | MAF   | Bayesian PP | Effect-size | P-value               |
|---------------|-------------------------------|--------------------|---------------|----------------|-------|-------------|-------------|-----------------------|
| 22            | <i>RAD51B</i>                 | <i>rs2842339</i>   | 14:68,986,999 | CNV            | 0.899 | 0.243       | -0.082      | $3.1 \times 10^{-7}$  |
| 23            | <i>ALDH1A2</i>                | <i>rs2414577</i>   | 15:58,680,638 | Txn_Elongation | 0.366 | 0.483       | -0.067      | $4.8 \times 10^{-17}$ |
| 24            | <i>CETP</i>                   | <i>rs17231569</i>  | 16:56,999,778 | WEnhancer      | 0.172 | 0.255       | -0.072      | $9.4 \times 10^{-21}$ |
| 25            | <i>CTRB2</i>                  | <i>rs72802342</i>  | 16:75,234,872 | CNV            | 0.074 | 0.317       | -0.114      | $2.8 \times 10^{-13}$ |
| 26            | <i>SARM1/SLC46A1</i>          | <i>rs4795434</i>   | 17:26,716,917 | WEnhancer      | 0.524 | 0.112       | 0.045       | $1.8 \times 10^{-9}$  |
| 27            | <i>NPLOC4</i>                 | <i>rs8070929</i>   | 17:79,530,993 | Txn_Elongation | 0.378 | 0.188       | 0.058       | $1.1 \times 10^{-12}$ |
| 28.1          | <i>C3</i>                     | <i>rs147859257</i> | 19:6,718,146  | SEnhancer      | 0.008 | 1.000       | 0.504       | $4.3 \times 10^{-31}$ |
| 28.2          | <i>C3</i>                     | <i>rs2230199</i>   | 19:6,718,387  | SEnhancer      | 0.764 | 0.999       | -0.172      | $1.7 \times 10^{-77}$ |
| 29            | <i>CNN2/ABCA7</i>             | <i>rs3087680</i>   | 19:1,038,289  | SEnhancer      | 0.109 | 0.360       | 0.072       | $8.6 \times 10^{-9}$  |
| 30.1          | <i>APOE/TOMM40</i>            | <i>rs429358</i>    | 19:45,411,941 | Txn_Elongation | 0.118 | 1.000       | -0.186      | $3.3 \times 10^{-46}$ |
| 31            | <i>MMP9</i>                   | <i>rs17577</i>     | 20:44,643,111 | APromoter      | 0.138 | 0.181       | -0.072      | $6.8 \times 10^{-11}$ |
| 32            | <i>Intergenic</i>             | <i>rs140611615</i> | 20:56,653,111 | CNV            | 0.062 | 0.080       | -0.135      | $8.2 \times 10^{-18}$ |
| 33            | <i>SYN3</i>                   | <i>rs5754227</i>   | 22:33,105,817 | CNV            | 0.124 | 0.774       | -0.128      | $2.0 \times 10^{-27}$ |
| 34            | <i>SLC16A8/PICK1/BAIAP2L2</i> | <i>rs8135665</i>   | 22:38,476,276 | CNV            | 0.206 | 0.652       | 0.066       | $2.9 \times 10^{-12}$ |

**Supplementary Table 12: AMD risk variants by Fgwas method in the known 34 loci, accounting for chromatin states profiled in the K562 cell type.** Variants with either the highest Fgwas PP per locus or Fgwas PP > 0.5 are listed (horizontal lines separate loci). Shown are reside/nearby genes, dbSNPIDs, positions, functional annotations, MAFs (unfolded, corresponding to the direction of effect-sizes), Fgwas PPs, and P-values.

| Signal number | Reside/Nearby Gene     | dbSNPID     | Chr:Position   | Anno          | MAF   | Fgwas PP | P-value                |
|---------------|------------------------|-------------|----------------|---------------|-------|----------|------------------------|
| 1             | <i>CFH</i>             | rs77498516  | 1:196,115,300  | CNV           | 0.048 | 0.522    | $8.2 \times 10^{-27}$  |
| 2             | <i>COL4A3</i>          | rs11884770  | 2:228,086,920  | CNV           | 0.731 | 0.183    | $5.7 \times 10^{-9}$   |
| 3             | <i>ADAMTS9-AS2</i>     | rs61092465  | 3:65,149,489   | CNV           | 0.021 | 0.001    | $1.6 \times 10^{-3}$   |
| 4             | <i>COL8A1</i>          | rs140647181 | 3:99,180,668   | CNV           | 0.019 | 0.999    | $5.4 \times 10^{-13}$  |
| 5             | <i>CFI</i>             | rs10033900  | 4:110,659,067  | WEenhancer    | 0.506 | 0.996    | $7.2 \times 10^{-19}$  |
| 6.1           | <i>C9</i>              | rs62358361  | 5:39,327,888   | CNV           | 0.012 | 0.559    | $3.1 \times 10^{-16}$  |
| 6.2           | <i>FYB</i>             | rs62358735  | 5:39,199,134   | APromoter     | 0.009 | 0.999    | $5.1 \times 10^{-13}$  |
| 7             | <i>PRLR/SPEF2</i>      | rs114092250 | 5:35,494,448   | WEenhancer    | 0.019 | 0.673    | $2.5 \times 10^{-9}$   |
| 8.1           | <i>HCG20/LINC00243</i> | rs114126524 | 6:30,763,893   | SEnhancer     | 0.171 | 0.810    | $6.5 \times 10^{-12}$  |
| 8.2           | <i>HCG22</i>           | rs140895602 | 6:31,024,244   | CNV           | 0.021 | 0.535    | $1.2 \times 10^{-12}$  |
| 8.3           | <i>HCP5</i>            | rs116319118 | 6:31,440,641   | CNV           | 0.017 | 0.521    | $5.3 \times 10^{-14}$  |
| 8.4           | <i>HSPA1L/HSPA1A</i>   | rs62395827  | 6:31,786,730   | SEnhancer     | 0.073 | 0.999    | $1.6 \times 10^{-46}$  |
| 8.5           | <i>NELFE/SKIV2L</i>    | rs116503776 | 6:31,930,462   | TxnElongation | 0.120 | 0.939    | $2.1 \times 10^{-114}$ |
| 8.6           | <i>MTCO3P1</i>         | rs114264172 | 6:32,672,214   | CNV           | 0.051 | 0.997    | $2.1 \times 10^{-14}$  |
| 8.7           | <i>COL11A2</i>         | rs114393147 | 6:33,125,742   | CNV           | 0.041 | 0.784    | $2.1 \times 10^{-10}$  |
| 9             | <i>VEGFA</i>           | rs943080    | 6:43,826,627   | CNV           | 0.518 | 0.428    | $2.0 \times 10^{-16}$  |
| 10            | <i>KMT2E/SRPK2</i>     | rs1142      | 7:104,756,326  | TxnElongation | 0.357 | 0.124    | $1.5 \times 10^{-10}$  |
| 11            | <i>ZKSCAN1</i>         | rs1122598   | 7:99,699,436   | APromoter     | 0.177 | 0.351    | $8.9 \times 10^{-8}$   |
| 12            | <i>TNFRSF10A</i>       | rs79037040  | 8:23,082,971   | APromoter     | 0.534 | 0.992    | $2.9 \times 10^{-12}$  |
| 13            | <i>Intergenic</i>      | rs10781176  | 9:76,592,874   | APromoter     | 0.684 | 0.109    | $3.0 \times 10^{-10}$  |
| 14            | <i>TRPM3</i>           | rs71507014  | 9:73,438,605   | CNV           | 0.584 | 0.858    | $3.2 \times 10^{-9}$   |
| 15            | <i>TGFBR1</i>          | rs10760667  | 9:101,864,607  | SEnhancer     | 0.186 | 0.132    | $2.5 \times 10^{-11}$  |
| 16            | <i>ABCA1</i>           | rs2740488   | 9:107,661,742  | CNV           | 0.266 | 0.761    | $1.7 \times 10^{-9}$   |
| 17            | <i>ARHGAP21</i>        | rs12357257  | 10:24,999,593  | TxnElongation | 0.232 | 0.308    | $4.3 \times 10^{-9}$   |
| 18            | <i>PSTK</i>            | rs140627984 | 10:124,723,092 | TxnElongation | 0.121 | 0.011    | $1.4 \times 10^{-6}$   |
| 19            | <i>OR6C7P</i>          | rs7487174   | 12:55,738,093  | APromoter     | 0.824 | 0.001    | $1.6 \times 10^{-3}$   |
| 20            | <i>MAPKAPK5</i>        | rs61941287  | 12:112,330,305 | TxnElongation | 0.019 | 0.542    | $1.2 \times 10^{-10}$  |
| 21            | <i>B3GALTL</i>         | rs9564692   | 13:31,821,240  | CNV           | 0.288 | 0.388    | $3.2 \times 10^{-11}$  |
| 22            | <i>RAD51B</i>          | rs11158728  | 14:68,762,205  | SEnhancer     | 0.640 | 0.082    | $1.0 \times 10^{-11}$  |
| 23            | <i>ALDH1A2</i>         | rs2414577   | 15:58,680,638  | TxnElongation | 0.366 | 0.495    | $4.8 \times 10^{-17}$  |
| 24            | <i>CETP</i>            | rs5817082   | 16:56,997,349  | CNV           | 0.248 | 0.236    | $1.7 \times 10^{-21}$  |
| 25            | <i>BCAR1</i>           | rs72802395  | 16:75,286,484  | TxnElongation | 0.068 | 0.653    | $2.1 \times 10^{-11}$  |

|      |                         |             |               |               |       |       |                       |
|------|-------------------------|-------------|---------------|---------------|-------|-------|-----------------------|
| 26   | <i>TMEM97/KRT18P55</i>  | rs11080055  | 17:26,649,724 | TxnElongation | 0.525 | 0.103 | $5.1 \times 10^{-9}$  |
| 27   | <i>NPLOC4</i>           | rs8070929   | 17:79,530,993 | TxnElongation | 0.378 | 0.186 | $1.1 \times 10^{-12}$ |
| 28.1 | <i>FUT6</i>             | rs12019136  | 19:5,835,677  | CNV           | 0.042 | 0.614 | $3.7 \times 10^{-17}$ |
| 28.2 | <i>C3</i>               | rs2230199   | 19:6,718,387  | APromoter     | 0.764 | 0.997 | $1.7 \times 10^{-77}$ |
| 29   | <i>CNN2/ABCA7</i>       | rs58369307  | 19:1,038,290  | SEnhancer     | 0.109 | 0.151 | $8.5 \times 10^{-9}$  |
| 30.1 | <i>APOE/TOMM40</i>      | rs429358    | 19:45,411,941 | TxnElongation | 0.118 | 1.000 | $3.3 \times 10^{-46}$ |
| 30.2 | <i>MARK4/AC006126.4</i> | rs73036519  | 19:45,748,362 | SEnhancer     | 0.293 | 0.507 | $3.6 \times 10^{-8}$  |
| 31   | <i>MMP9</i>             | rs142450006 | 20:44,614,991 | CNV           | 0.133 | 0.132 | $1.4 \times 10^{-11}$ |
| 32   | <i>C20orf85</i>         | rs117739907 | 20:56,652,781 | CNV           | 0.062 | 0.079 | $7.8 \times 10^{-18}$ |
| 33   | <i>SYN3</i>             | rs5754227   | 22:33,105,817 | CNV           | 0.124 | 0.781 | $2.0 \times 10^{-27}$ |
| 34   | <i>SLC16A8/PICK1</i>    | rs8135665   | 22:38,476,276 | CNV           | 0.205 | 0.649 | $2.9 \times 10^{-12}$ |

**Supplementary Table 13: Novel AMD loci (with Bayesian regional-PP>0.95) identified by SFBA, accounting for chromatin states profiled in the K562 cell type.** Variants with the highest Bayesian PPs in the novel loci are listed in this table. Shown are reside genes, dbSNPIDs, positions, functional annotations, MAFs, P-values, Bayesian regional-PPs, and Bayesian PPs/effect-sizes.

| Locus | Reside gene      | dbSNPID     | Chr:Position   | Anno          | MAF   | P-value              | Regional-PP | Bayesian PP | Effect-size |
|-------|------------------|-------------|----------------|---------------|-------|----------------------|-------------|-------------|-------------|
| 2     | <i>ZNRD1-AS1</i> | rs114357644 | 6:29,924,728   | TxnElongation | 0.669 | $2.3 \times 10^{-7}$ | 0.999       | 0.669       | 0.051       |
| 3     | <i>CPN1</i>      | rs111563092 | 10:101,808,993 | CNV           | 0.045 | $7.2 \times 10^{-8}$ | 0.970       | 0.081       | -0.106      |

**Supplementary Table 14: Novel AMD loci (with Bayesian regional-PP>0.95) identified by Fgwas, accounting for chromatin states profiled in the K562 cell type.** Variants with the highest Fgwas PPs in the novel loci are listed in this table. Shown are reside genes, dbSNPIDs, positions, functional annotations, MAFs, P-values, Fgwas regional-PPs, Fgwas PPs, and Bayesian effect-sizes.

| Locus | Reside gene       | dbSNPID     | Chr:Position   | Anno          | MAF   | P-value              | Regional-PP | Fgwas PP | Effect-size |
|-------|-------------------|-------------|----------------|---------------|-------|----------------------|-------------|----------|-------------|
| 1     | <i>PPIL3</i>      | rs3851973   | 2:201,732,878  | SEnhancer     | 0.127 | $1.1 \times 10^{-7}$ | 0.963       | 0.094    | -0.059      |
| 2     | <i>SERPINE2</i>   | rs7588220   | 2:224,873,604  | WEnhancer     | 0.025 | $3.2 \times 10^{-5}$ | 0.966       | 0.001    | 0.129       |
| 3     | <i>Intergenic</i> | rs4674883   | 2:225,184,903  | CNV           | 0.573 | $1.2 \times 10^{-7}$ | 0.965       | 0.141    | 0.043       |
| 4     | <i>ABI3BP</i>     | rs182405490 | 3:100,545,967  | CNV           | 0.007 | $3.3 \times 10^{-5}$ | 0.999       | 0.001    | 0.247       |
| 5     | <i>RPL34-AS1</i>  | rs151204018 | 4:108,847,538  | CNV           | 0.007 | $4.8 \times 10^{-4}$ | 0.988       | 0.001    | 0.254       |
| 6     | <i>ZNRD1-AS1</i>  | rs75140056  | 6:29,608,184   | TxnElongation | 0.601 | $9.6 \times 10^{-9}$ | 0.999       | 0.261    | 0.045       |
| 7     | <i>PACSN1</i>     | rs6922076   | 6:33,807,565   | SEnhancer     | 0.446 | $9.9 \times 10^{-6}$ | 0.995       | 0.004    | -0.035      |
| 8     | <i>CPN1</i>       | rs111563092 | 10:101,808,993 | CNV           | 0.045 | $7.2 \times 10^{-8}$ | 0.993       | 0.088    | -0.106      |
| 9     | <i>ABHD2</i>      | rs2070780   | 15:89,760,997  | CNV           | 0.485 | $1.6 \times 10^{-7}$ | 0.968       | 0.075    | 0.043       |
| 10    | <i>SEMA4B</i>     | rs11547962  | 15:90,772,005  | TxnElongation | 0.399 | $4.3 \times 10^{-5}$ | 0.973       | 0.001    | 0.032       |

**Supplementary Table 15: Haplotype analysis in locus C2/CFB/SKIV2L, consisting with the top significant intronic variant found by single variant test P-values (*rs116503776* with  $p\text{-value}=2.1 \times 10^{-114}$ ), the top two significant missense variants (in the  $\pm 20\text{KB}$  region around *rs116503776*) found by SFBA (*rs4151667* with Bayesian PP=0.903, *rs115270436* with Bayesian PP= 0.638).**

| Region        | Haplotype                              |                                   |                                     | Haplotype Frequency (%) |                      | P-value               | OR (95% CI)           |
|---------------|----------------------------------------|-----------------------------------|-------------------------------------|-------------------------|----------------------|-----------------------|-----------------------|
|               | SKIV2L intronic ( <i>rs116503776</i> ) | CFB missense ( <i>rs4151667</i> ) | CFB missense ( <i>rs115270436</i> ) | Cases                   | Controls             |                       |                       |
| C2/CFB/SKIV2L | 1                                      | 1                                 | 1                                   | $1.5 \times 10^{-3}$    | $4.2 \times 10^{-3}$ | $8.9 \times 10^{-11}$ | 0.364 (0.265, 0.501)  |
|               | 1                                      | 0                                 | 1                                   | 0.046                   | 0.085                | $1.5 \times 10^{-86}$ | 0.522 (0.490, 0.557)  |
|               | 1                                      | 1                                 | 0                                   | 0.023                   | 0.041                | $5.0 \times 10^{-36}$ | 0.561 (0.513, 0.613)  |
|               | 0                                      | 0                                 | 1                                   | $8.9 \times 10^{-4}$    | $1.5 \times 10^{-3}$ | 0.024                 | 0.586 (0.375, 0.917)  |
|               | 1                                      | 0                                 | 0                                   | 0.018                   | 0.017                | 0.092                 | 1.102 (0.983, 1.236)  |
|               | 0                                      | 0                                 | 0                                   | 0.909                   | 0.850                | $1.0 \times 10^{-22}$ | 1.752 (1.670, 1.838)  |
|               | 0                                      | 1                                 | 0                                   | $6.1 \times 10^{-5}$    | $2.8 \times 10^{-5}$ | 0.306                 | 1.840 (0.243, 13.938) |

**Supplementary Table 16: Linear regression analysis with a model with the top two independent significant variants (*rs116503776*, *rs114254831*) found by conditional analysis, versus a model with the top two significant variants (*rs4151667*, *rs115270436*) found by SFBA accounting for functional annotations.**

| Region (C2/CFB/SKIV2L)               | SKIV2L intronic ( <i>rs116503776</i> ) & PBX2 intronic ( <i>rs114254831</i> ) | CFB missense ( <i>rs4151667</i> ) & SKIV2L missense ( <i>rs115270436</i> ) | Differences (col2-col3) |
|--------------------------------------|-------------------------------------------------------------------------------|----------------------------------------------------------------------------|-------------------------|
| Akaike information criterion (AIC)   | 95857.36                                                                      | 95752.63                                                                   | 104.73                  |
| Bayesian information criterion (BIC) | 95891.1                                                                       | 95786.36                                                                   | 104.74                  |
| Log Likelihood                       | -47924.68                                                                     | -47872.31                                                                  | -52.37                  |

**Supplementary Table 17: Number of loci (regional-PP>0.95) identified by accounting for chromatin states profiled in 9 human cell types, with the number of variants that contribute 95% posterior probabilities.**

| Cell types  | Number of identified loci | Total number of variants | Average number of variants per locus |
|-------------|---------------------------|--------------------------|--------------------------------------|
| H1-hESC     | 32                        | 481                      | 15.0                                 |
| <b>K562</b> | <b>31</b>                 | <b>454</b>               | <b>14.6</b>                          |
| GM12878     | 31                        | 481                      | 15.5                                 |
| HepG2       | 35                        | 609                      | 18.4                                 |
| HUVEC       | 32                        | 595                      | 18.5                                 |
| HSMM        | 33                        | 608                      | 18.4                                 |
| NHLF        | 33                        | 542                      | 16.4                                 |
| NHEK        | 31                        | 524                      | 16.9                                 |
| HMEC        | 34                        | 529                      | 15.5                                 |
